# 1 **Streptococcus species abundance in the gut is linked to subclinical coronary** 2 **atherosclerosis in 8,973 participants from the SCAPIS cohort**

3 Sergi Sayols-Baixeras<sup>1,2\*</sup>, Koen F Dekkers<sup>1\*</sup>, Ulf Hammar<sup>1</sup>, Gabriel Baldanzi<sup>1</sup>, Yi-Ting Lin<sup>3,4</sup>, Shafqat  
4 Ahmad<sup>1,5</sup>, Diem Nguyen<sup>1</sup>, Georgios Varotsis<sup>1</sup>, Sara Pita<sup>6,7</sup>, Nynne Nielsen<sup>6</sup>, Aron C. Eklund<sup>6</sup>, Jacob B  
5 Holm<sup>6</sup>, H Bjørn Nielsen<sup>6</sup>, Louise Brunkwall<sup>8</sup>, Filip Ottosson<sup>8,9</sup>, Christoph Nowak<sup>3</sup>, Daniel  
6 Jönsson<sup>8,10,11</sup>, Dan Ericson<sup>12</sup>, Björn Klinge<sup>11,13</sup>, Peter M Nilsson<sup>8,14</sup>, Andrei Malinowski<sup>15</sup>, Lars Lind<sup>16</sup>,  
7 Göran Bergström<sup>17,18</sup>, Johan Sundström<sup>19,20</sup>, Johan Ärnlov<sup>3,21</sup>, Gunnar Engström<sup>8</sup>, J. Gustav  
8 Smith<sup>22,23,24</sup>, Marju Orho-Melander<sup>8#</sup> and Tove Fall<sup>1#</sup>

9 \*Shared first authorship

10 #Shared senior authorship

11 <sup>1</sup>Department of Medical Sciences, Molecular Epidemiology and Science for Life Laboratory, Uppsala  
12 University, EpiHubben, MTC-huset, Uppsala, Sweden

13 <sup>2</sup>CIBER Cardiovascular diseases (CIBERCV), Instituto de Salud Carlos III, Madrid, Spain.

14 <sup>3</sup>Division of Family Medicine and Primary Care, Department of Neurobiology, Care Science and  
15 Society, Karolinska Institutet, Huddinge, Sweden

16 <sup>4</sup>Department of Family Medicine, Kaohsiung Medical University Hospital, Kaohsiung Medical  
17 University, Taiwan

18 <sup>5</sup>Preventive Medicine Division, Harvard Medical School, Brigham and Women's Hospital, Boston,  
19 MA, United States

20 <sup>6</sup>Clinical Microbiomics A/S, Copenhagen, Denmark

21 <sup>7</sup>The Novo Nordisk Foundation Center for Biosustainability, Technical University of Denmark,  
22 Lyngby, Denmark

23 <sup>8</sup>Department of Clinical Sciences in Malmö, Lund University, Malmö, Sweden

**NOTE: This preprint reports new research that has not been certified by peer review and should not be used to guide clinical practice.**

- 24 <sup>9</sup>Section for Clinical Mass Spectrometry, Danish Center for Neonatal Screening, Department of  
25 Congenital Disorders, Statens Serum Institut, Copenhagen, Denmark
- 26 <sup>10</sup>Public Dental Service of Skåne, Lund, Sweden.
- 27 <sup>11</sup>Department of Periodontology, Faculty of Odontology, Malmö University, Malmö, Sweden.
- 28 <sup>12</sup>Department of Cariology, Faculty of Odontology, Malmö University, Malmö, Sweden.
- 29 <sup>13</sup>Department of Dental Medicine, Karolinska Institutet, Solna, Sweden.
- 30 <sup>14</sup>Department of Internal Medicine, Skånes University Hospital, Malmö, Sweden
- 31 <sup>15</sup>Department of Medical Sciences, Clinical Physiology, Uppsala University, Uppsala, Sweden.
- 32 <sup>16</sup>Department of Medical Sciences, Clinical Epidemiology, Uppsala University, Uppsala Science Park,  
33 Uppsala, Sweden
- 34 <sup>17</sup>Department of Molecular and Clinical Medicine, Institute of Medicine, Sahlgrenska Academy,  
35 University of Gothenburg, Gothenburg, Sweden
- 36 <sup>18</sup>Department of Clinical Physiology, Sahlgrenska University Hospital, Region Västra Götaland,  
37 Gothenburg, Sweden
- 38 <sup>19</sup>Department of Medical Sciences, Clinical Epidemiology, Uppsala University, Uppsala, Sweden
- 39 <sup>20</sup>The George Institute for Global Health, University of New South Wales, Sydney, Australia
- 40 <sup>21</sup>School of Health and Social Studies, Dalarna University, Falun, Sweden
- 41 <sup>22</sup>The Wallenberg Laboratory/Department of Molecular and Clinical Medicine, Institute of Medicine,  
42 Gothenburg University and the Department of Cardiology, Sahlgrenska University Hospital,  
43 Gothenburg, Sweden

44 <sup>23</sup>Department of Cardiology, Clinical Sciences, Lund University and Skåne University Hospital, Lund,  
45 Sweden

46 <sup>24</sup>Wallenberg Center for Molecular Medicine and Lund University Diabetes Center, Lund University,  
47 Lund, Sweden

48 WORD COUNT: 4,472

## 49 **Abstract**

50 Coronary atherosclerosis is the main pathophysiological mechanism underlying myocardial infarction.  
51 The gut microbiota has been implicated in cardiometabolic disease but its relationship with subclinical  
52 coronary atherosclerosis is unknown. We identified 73 gut metagenomics species associated with  
53 coronary artery calcium score (CACS) in 8,973 SCAPIS participants without previous cardiovascular  
54 disease. *Streptococcus* associations were overrepresented and were validated in an independent case-  
55 control study together with eight non-*Streptococcus* spp. We further found enrichment for bacterial  
56 genes linked to amino acid and carbohydrate degradation functions. Gut *Streptococcus* spp. were  
57 associated with circulating biomarkers of inflammation and infection response, bile acids, androgenic  
58 steroids and sphingomyelins, and were associated with their homologous species in the oral cavity,  
59 which were in turn associated with oral pathologies. This study provides robust evidence of the  
60 association of *Streptococcus* spp., with subclinical atherosclerosis and markers of systemic  
61 inflammation and infection, calling for studies re-investigating the infectious hypothesis in  
62 atherosclerosis pathogenesis.

63 Atherosclerotic cardiovascular diseases (ACVD), such as ischemic heart disease and ischemic stroke,  
64 are the major causes of death and disability<sup>1</sup>. The formation of atherosclerotic plaques is a silent,  
65 complex, and progressive process characterized by accumulation of lipids, fibrous elements, calcium  
66 minerals, and inflammatory molecules in the subendothelial space<sup>2</sup>. While the underlying mechanisms  
67 of atherosclerosis remain incompletely understood, it has been proposed that the gut microbiota  
68 composition could contribute to accelerated atherosclerotic development by transmission of bacteria  
69 into circulation, resulting in either subsequent direct infection of the atherosclerotic plaque or systemic  
70 inflammation associated with infection at other sites<sup>2</sup>. For instance, experimental studies suggested  
71 that oral challenge with *Streptococcus* spp. accelerates atherosclerotic plaque growth and macrophage  
72 invasion<sup>3</sup>. Alternatively, certain bacteria could affect the atherosclerosis process by modulating the  
73 host metabolism or interaction with dietary components to produce both beneficial and harmful  
74 molecules<sup>2</sup>. Gut microbiota composition has already been linked to cardiovascular risk factors, such as  
75 obesity<sup>4</sup>, insulin resistance<sup>5</sup> and type 2 diabetes<sup>6</sup>, although the causal relationships remain unclear. A  
76 number of case-control studies of symptomatic coronary atherosclerosis with up to 1,241 participants  
77 have pointed to differences in abundance of more than 500 gut species<sup>7-15</sup>. However, the findings are  
78 often not reproducible and are prone to bias; comparison groups are often non-comparable in terms of  
79 medical treatment and lifestyle factors, and there is risk of reverse causation. The importance of  
80 employing large cohorts in microbiome research of earlier phases of the atherosclerosis process are  
81 thus compelling<sup>7,13,14,16,17</sup>.

82 Here, we identified associations between gut microbiota composition, in particular *Streptococcus* spp.,  
83 and asymptomatic coronary atherosclerosis, determined by computed tomography-derived coronary  
84 artery calcium score (CACs), in a large cohort of middle-aged Swedes from the Swedish  
85 CARDioPulmonary bioImage Study (SCAPIS)<sup>18</sup> and validated in a geographically distinct case-control  
86 study of symptomatic atherosclerotic disease. Furthermore, we identified associations of gut  
87 *Streptococcus* spp. with circulating inflammatory and infection biomarkers. These species were further  
88 associated with the corresponding oral *Streptococcus* spp. that in turn were associated with worse oral  
89 health. In conclusion, we identify a subset of gut microbiota species with enrichment for *Streptococcus*

90 that are robustly associated with CACS, laying the foundation for future studies on causal  
91 relationships and investigations of the plausibility of these species as potential intervention targets to  
92 reduce cardiovascular risk.

## 93 **Results**

94 **Large Swedish cohort profiled with deep shotgun metagenomics of fecal samples and detailed**  
95 **coronary atherosclerosis imaging.** In the current study, we took advantage of SCAPIS, a unique  
96 resource for epidemiological studies combining a large sample size with extensive and in-depth  
97 phenotypic information, including cutting-edge molecular techniques and direct imaging of the  
98 cardiovascular disease (CVD) processes<sup>18</sup>. We selected 8,973 individuals recruited at the Malmö and  
99 Uppsala sites, aged 50–64 years, with no history of symptomatic CVD. A description of the main  
100 sociodemographic and clinical characteristics of the study population is presented in **Table 1**,  
101 including the prevalence of calcified coronary plaques, measured as CACS and categorized as absent  
102 (CACS=0), mild (1–100), moderate (101–400), and extensive (>400) calcification of coronary arteries.  
103 The prevalence of CACS>0 in the study sample was 40.3%, comparable to the whole SCAPIS  
104 population<sup>19</sup>, which in turn showed a high agreement with contrast-enhanced coronary computed  
105 tomography angiography (CCTA), an alternate measurement of atherosclerosis<sup>19</sup>. Only 5.5% of the  
106 participants with CACS=0 were classified as having any coronary atherosclerosis.

107 **Gut microbiota composition and richness are associated with asymptomatic atherosclerosis and**  
108 **attenuated by adjustment for lifestyle factors, diet and medication.** To test the primary hypothesis  
109 that gut microbiota composition is associated with CACS at the asymptomatic disease stage, we first  
110 tested whether the alpha and beta diversity measures were associated with CACS. Alpha diversity, a  
111 measure of overall species richness and evenness within each sample, was inversely associated with  
112 CACS ( $\beta=-0.16$  (95% confidence interval (CI) = -0.26, -0.07, p-value= $8.6 \times 10^{-4}$ )) using linear  
113 regression adjusting for age, sex, country of birth, center site and extraction plate (basic model).  
114 However, after further adjustment for smoking, physical activity, fiber and total energy intake, and  
115 self-reported medication for dyslipidemia, hypertension and/or diabetes (full model), no association

116 was observed ( $\beta=-0.04$  (95% CI=-0.15, 0.06, p-value=0.38)). These covariates were included because  
117 our hypothetical causal diagram indicated them as potential confounders for the microbiota-CACS  
118 association (**Extended Data Fig. 1**). Further, in permutational multivariate analysis of variance  
119 (PERMANOVA), we found that beta diversity, an indicator of the overall similarity among samples,  
120 differed across the CACS categories in both models, although the fully adjusted model was attenuated  
121 ( $r^2_{\text{basic}}=0.0007$ ;  $p\text{-value}_{\text{basic}}=1*10^{-04}$  vs  $r^2_{\text{full}}=0.0004$ ;  $p\text{-value}_{\text{full}}=0.036$ ). Pairwise comparisons revealed  
122 that the overall microbiome composition in participants with CACS=0 was different compared to other  
123 categories, with increasing distances with higher CACS classes (**Figure 1 and Supplementary Table**  
124 **1**). These findings suggest that gut microbiome composition and richness are associated with  
125 asymptomatic atherosclerosis, but that differences are partly due to differences in lifestyle factors, diet,  
126 and medication across groups.

127 **Specific species are robustly associated with subclinical atherosclerosis, especially species**  
128 **belonging to the *Streptococcus* genus.** Extensive simulation studies prior to the analysis supported  
129 the use of linear regression modelling for high power, interpretability, and low frequency of false  
130 positive findings (**Extended Data Fig. 2**). We found the relative abundance of 73 out of 1,985 tested  
131 species associated with CACS at a false discovery rate (FDR) of 5% using the basic model further  
132 adjusted for Shannon diversity index. For 60 of these, the relative abundance was positively associated  
133 with CACS and for 13 negatively associated (**Fig. 2a, b, d, Supplementary Tables 2 and 3**). Gene-  
134 set enrichment analysis (GSEA) for genera revealed an overrepresentation of the *Streptococcus* genus  
135 in the associations with a positive effect estimate (**Fig. 2a, c, and Supplementary Table 4**). In the full  
136 model (further adjusted for Shannon diversity index), 63 species remained associated with CACS in  
137 8,155 individuals with complete data on all covariates (**Fig. 2a, d, and Supplementary Table 3**).  
138 *Streptococcus anginosus*, *Streptococcus oralis* subsp. *oralis*, *Anaerotignum lactatifermentans*,  
139 *Escherichia coli*, and *Eubacteriales* sp. (internal identifier HG3A.1354) were most strongly species  
140 associated with CACS based on p-value, and all of them were positively associated. To assess whether  
141 the difference in the number of associated species between basic and full model was due to smaller  
142 sample size or confounding by the included covariates in the full model, we re-analyzed the 73 species

143 associations with the basic model restricted to the 8,155 individuals with complete data that were  
144 included in the full model. This analysis showed highly correlated (Pearson correlation=0.99) but  
145 slightly attenuated estimates compared to the full model, supporting the difference in the number of  
146 associated species between basic and full model to be mainly due to lower power and to some extent  
147 confounding (**Supplementary Table 3 and Extended Data Fig. 3**). A comparison of the main clinical  
148 characteristics of carriers and non-carriers of the most strongly associated species *S. anginosus* and *S.*  
149 *oralis* subsp. *oralis* (**Supplementary Table 5**) revealed that these *Streptococcus* spp. were more  
150 prevalent in women. Carriers had on average higher triglycerides, blood pressure, body mass index  
151 (BMI), high-sensitivity C-reactive protein (hsCRP), leukocytosis, neutrophilia, prevalence of diabetes,  
152 ulcerative and Crohn's disease, and medication use compared to the non-carriers. Sensitivity analyses  
153 performed using partial Spearman correlation showed loss-of-significance for 32 species. However,  
154 extensive sensitivity analyses did not find any evidence for this difference resulting from single  
155 influential observations nor non-linear effects, and differences were thereby likely to be due to lower  
156 power compared to linear model (**Supplementary Information, Supplementary Table 6 and 7**).  
157 Even if not directly indicated as confounders, we further assessed the effect of adjustment for BMI and  
158 proton-pump inhibitors (PPI) medication, as well as excluding specific groups of individuals such as  
159 those with Crohn's disease or those with antibiotic treatment the past 12 months from the analyses. .  
160 We also tested the effect of not adjusting the basic and full models for Shannon diversity index to  
161 observe if some of these factors could explain the identified associations of the species and CACS  
162 (extensively explained in **Supplementary Information, Extended Data Fig. 4, Supplementary**  
163 **Table 6 and 7**). Statistical significance was lost for a few species in some of the analyses; however,  
164 effect estimates remained largely similar. Overall, these findings indicate that the associations  
165 identified in the main analysis were robust and were not in general affected by statistical model  
166 misspecification, PPI or antibiotic use, or gastrointestinal disease. Moreover, our findings show that  
167 the identified species are in general associated with CACS independent of established cardiovascular  
168 risk factors.

169 **Sex modifies the association between certain species and subclinical atherosclerosis.** We re-  
170 assessed the 63 species associated with CACS in the full model stratifying for sex, and tested whether  
171 the effect estimates in the female strata were different to the male strata (**Extended Data Fig. 5,**  
172 **Supplementary Tables 3 and 8**). *Streptococcus agalactiae*, *Rothia mucilaginosa*, and two  
173 *Eubacteriales* spp. (HG3A.0242 and HG3A.0854) showed different effect estimates across sex  
174 (Cochran's Q-test p-value<0.05) where the two first mentioned species were associated in females only  
175 and the two latter in males only. These findings indicate that sex-specific associations are present  
176 between gut microbiota and subclinical coronary atherosclerosis.

177 **Few CACS-related species are also associated with carotid atherosclerosis.** Next, using ordinal  
178 regression analysis with basic model adjustment and a FDR of 5%, we searched for associations of  
179 CACS-associated species with carotid atherosclerosis in 8,955 SCAPIS participants with available  
180 information of carotid atherosclerosis measured with ultrasound, in addition to deep shotgun  
181 metagenomics and CACS (**Supplementary Table 9**). Subjects were categorized as “no identified  
182 atherosclerosis” (n=3,821), “atherosclerosis in one carotid artery” (n=2,779), and “atherosclerosis in  
183 both arteries” (n=2,355). Carotid atherosclerosis was detectable in 57% of the SCAPIS participants  
184 which is higher than in previous large-cohort studies: 34% in the Atherosclerosis Risk in Communities  
185 study (ARIC)<sup>20</sup>, 47% in the Multi-Ethnic Study of Atherosclerosis (MESA)<sup>21</sup>, 44% in the Malmö Diet  
186 and Cancer study (MDC)<sup>22</sup>, and 45% in Risk Evaluation For INfarct Estimates (REFINE)-Reykjavik  
187 study<sup>23</sup>. Twenty-one of the CACS-related species were associated with carotid atherosclerosis in the  
188 basic model including *Streptococcus mutans*. However, *Blautia obeum*, *Clostridium phoceensis*,  
189 *Oscillibacter* sp. (HG3A.0243), *Intestinimonas* sp. (HG3A.1018) and three *Eubacteriales* spp.  
190 (HG3A.0242, HG3A.0511, HG3A.1158) remained significant in the ordinal regression with the full  
191 model adjustment (**Supplementary Table 9**). These results may suggest that gut microbiota  
192 associations differ between the two vascular beds; however, it might also depend on differences in the  
193 measurement methods.

194 **Fifteen CACS-related species, including seven *Streptococcus* spp., are validated using a case-**  
195 **control study of symptomatic atherosclerotic cardiovascular patients.** We next attempted to



196 replicate findings using shotgun metagenomics data from a case-control study<sup>13</sup> of 210 patients with  
197 symptomatic ACVD and 163 controls from a Chinese population representing a later stage of the  
198 atherosclerotic process, wider age range (32–107 years), different genetic background and  
199 geographical area, and also likely different dietary habits and medication usage, which are all factors  
200 that can modulate gut microbiota composition. Of the 73 species associated with CACS in the basic  
201 model in the current study, we could identify 64 species using the same gene sequence signatures as in  
202 the SCAPIS study. Fifteen of these 64 species, including seven *Streptococcus* spp. were associated  
203 with ACVD with consistent effect direction as in SCAPIS using logistic regression models adjusted  
204 for age, sex and Shannon diversity index at an FDR of 5%, where disease status was the dependent  
205 variable and the rank-base inverse transformation of the relative abundance was set as the independent  
206 variable of interest (**Extended Data Fig. 6 and Supplementary Table 10**).

207 **Trehalose and fructose degradation genes are enriched in CACS-related species, especially in**  
208 ***Streptococcus* genus.** Next, to identify possible bacterial functions that might be involved in the  
209 coronary subclinical atherosclerosis and shared between the associated bacteria, we used GSEA to  
210 identify functional gut metabolic modules (GMM)<sup>24</sup> enriched for the CACS-associated species. The  
211 GSEA were based on ranked p-values from the basic association model with CACS stratified by the  
212 direction of the regression coefficient. The analysis revealed four enriched functional GMM in the  
213 bacterial species positively associated with CACS, and one enrichment in species negatively  
214 associated with CACS (**Extended Data Fig. 7a, b and Supplementary Table 11 and 12**). The  
215 positive enriched modules were involved in amino acid degradation (threonine degradation I and II)  
216 and carbohydrate degradation (trehalose degradation and fructose degradation), while the negative  
217 module was involved in acetogenesis. To test if these functions were enriched due to the  
218 overrepresentation of *Streptococcus* spp. associated with CACS, we performed GSEA applying leave-  
219 one (taxon)-out analysis (**Extended Data Fig. 7c, Supplementary Table 13 and 14**). This analysis  
220 revealed that the trehalose and fructose degradation functions were strongly attenuated when we  
221 removed *Streptococcus* spp., and to a lesser extent the threonine degradation II, supporting that  
222 *Streptococcus* spp. are important contributors for the association of these functions with CACS.

223 *Streptococcus* spp. have a high ability to catalyze different types of carbohydrates including most  
224 common dietary sugars (fructose, glucose and sucrose) forming compounds involved in virulence  
225 processes including biofilm buildup<sup>25</sup>. Trehalose degradation has been linked to virulence, and its role  
226 as a stress protectant has been linked to protection from desiccation freezing, starvation, and osmotic  
227 stress<sup>26,27</sup>. For threonine degradation I, *Roseburia* was the important genus, for threonine degradation  
228 II, *Bifidobacterium*, and for homoacetogenesis, *Romboutsia*. Together, these results show that CACS-  
229 associated species share, at least partially, some specific bacterial functions related to amino acid and  
230 carbohydrate degradation, and that *Streptococcus* spp. were the most important contributor to the  
231 enrichment for trehalose degradation genes, a function previously linked to bacterial virulence.

232 **Plasma bile acids, androgenic steroids, and sphingomyelin-associations with CACS-associated**  
233 ***Streptococcus* spp. are overrepresented.** Next, we identified 2,377 associations between seven  
234 CACS-associated *Streptococcus* spp., and 873 of the 1,412 plasma metabolites detected in 7,252  
235 SCAPIS participants using partial Spearman correlation adjusted at 5% FDR (**Extended Data Fig. 8**  
236 and **Supplementary Table 15**). Among the positive associations, primary bile acid metabolism was  
237 enriched in four *Streptococcus* spp. (*S. gordonii*, *S. parasanguinis*, *S. salivarius*, and *S. oralis* subsp.  
238 *oralis*), while secondary bile acid metabolism, acetylated peptides, and analgesics and anesthetics  
239 drugs sub-pathway were enriched in *S. anginosus*; and plasmalogen in *S. oralis* subsp. *oralis* (**Fig. 3a**  
240 and **Supplementary Table 16**). At individual metabolite level, all 11 primary bile acid metabolites  
241 were positively associated with all the *Streptococcus* spp. with adjusted p-values<0.05, with the  
242 exception of chenodeoxycholic acid sulfate. We further observed that metabolites from analgesic and  
243 anesthetic medications were positively associated with all the *Streptococcus* spp., particularly those  
244 metabolites derived from paracetamol. Furthermore, omeprazole was strongly associated with the  
245 *Streptococcus* spp., with the exception of *S. agalactiae*. In contrast, androgenic steroids metabolites  
246 and sphingomyelins showed enrichment among the metabolites negatively correlated with *S. gordonii*,  
247 *S. parasanguinis*, *S. salivarius*, and *S. mutans*; and *S. mutans* and *S. anginosus* respectively (**Figure 3a**  
248 and **Supplementary Table 17**). Notably, all androgenic steroids and 26 of the 29 sphingomyelins  
249 metabolites were negatively associated with CACS-related *Streptococcus* spp. with adjusted p-

250 values < 0.05. For androgenic steroids, sex-differences in the effect estimates were tested. Eleven  
251 metabolites reported different effect estimates across sex (Cochran's Q-test p-value < 0.05).  
252 Collectively, these results show the tight relationship between CACS-associated *Streptococcus* spp.  
253 and endogenous and exogenous metabolites. Next, we additionally adjusted the full model assessing  
254 the relationship between *Streptococcus* spp. and CACS for the *Streptococcus*-associated metabolites  
255 (with < 30% missing data) involved in sub-pathways related to primary and secondary bile acids  
256 metabolism, acetylated peptides, plasmalogen, androgenic steroids, sphingomyelins, analgesic and  
257 anesthetic drugs, and/or partially characterized molecules to assess the potential mediation by these  
258 metabolites (**Extended Data Fig. 9** and **Supplementary Table 18**). The inclusion of these metabolites  
259 in the models did not attenuate the association between *Streptococcus* spp. and CACS compared with  
260 the full model restricted to complete data (n=5,683), indicating that the association is not mediated by  
261 these metabolites (**Extended data Fig. 9**).

262 ***Streptococcus* spp. are associated with markers of systemic inflammation and infection.** To test  
263 whether *Streptococcus* spp. were associated with markers of systemic inflammation and infection,  
264 respectively, we evaluated the associations between these species and high-sensitivity plasma C-  
265 reactive protein (hsCRP) (n=7,248), and counts of leukocytes (n=7,237) and neutrophils (n=7,235).  
266 Five out of seven CACS-associated *Streptococcus* spp. (*S. anginosus*, *S. parasanguinis*, *S. oralis*  
267 subsp. *oralis*, *S. gordonii* and *S. salivarius*) were positively associated with hsCRP and leukocyte  
268 counts. The same five *Streptococcus* spp. and *S. mutans* were positively associated with neutrophil  
269 counts (**Fig. 3b** and **Supplementary Table 19**). These models were adjusted for age, sex, country of  
270 birth, smoking, physical activity, fiber and total energy intake, and self-reported medication for  
271 dyslipidemia, hypertension and/or diabetes, Shannon diversity index, center site and extraction plate.  
272 The inclusion of BMI and PPI into the models attenuated the estimates but all five species remained  
273 associated with hsCRP, while only *S. parasanguinis* and *S. salivarius* remained associated with  
274 leukocytes and neutrophils counts. *S. oralis* subsp. *oralis* was also associated with neutrophils counts  
275 (**Supplementary Table 20**).

276 Overall, these findings suggest that these *Streptococcus* spp. are related to markers of inflammation  
277 and infection, which have been described as plausible mechanisms in gut microbiota effects on the  
278 atherosclerosis process<sup>2</sup>.

279 **Gut *Streptococcus* spp. are correlated with oral *Streptococcus* spp. and the latter are associated**  
280 **with oral health.** *Streptococcus* spp. are commonly localized in the oral cavity and are linked to worse  
281 oral health status. We investigated the correlation between the abundance of CACS-related  
282 *Streptococcus* spp. in the fecal and saliva samples from 343 participants in the Malmö Offspring  
283 Dental Study (MODS) with an age range between 23 and 71 years who underwent a thorough dental  
284 examination within 4 to 12 months after fecal sampling in the Malmö Offspring Study (MOS)<sup>28</sup>. The  
285 gene signature in the saliva samples mapped to *S. anginosus*, *S. parasanguinis*, *S. gordonii*, *S. mutans*,  
286 *S. oralis*, and two different *S. salivarius* (Ho1B.0002 and Ho1B.0234) in the catalogue. Unfortunately,  
287 we could not identify *S. agalactiae* in the saliva samples. We applied partial Spearman correlations  
288 with cluster-robust standard errors accounting for relatedness between the CACS-related  
289 *Streptococcus* spp. in the gut and the corresponding species in the oral cavity adjusting for age, sex,  
290 country of birth, and extraction plate of the fecal samples. Five *Streptococcus* spp. (*S. anginosus*, *S.*  
291 *parasanguinis*, *S. gordonii*, *S. mutans* and *S. salivarius*) from the fecal samples were positively  
292 associated with their homologous species in the oral cavity ( $\rho=0.15-0.30$ ) (**Supplementary Table**  
293 **21**). To investigate whether the oral *Streptococcus* spp. corresponding to CACS-associated gut  
294 bacteria species were associated with oral health, we fitted a series of ordinal regressions with cluster-  
295 robust standard errors with three different outcomes (filled surfaces, surfaces with caries (initial and  
296 manifest), or gingival inflammation in 637 participants from MODS. These models were adjusted for  
297 age, sex, smoking, education, oral hygiene, activity realized the hour before the dental examination  
298 including eating, brushing teeth or/and smoking, and Shannon diversity index (**Extended data Fig.**  
299 **10**). *S. anginosus* was associated with all three outcomes at 5% FDR. *S. mutans* was associated with  
300 gingival inflammation and caries. *S. parasanguinis* and *S. salivarius* were associated with filled  
301 surfaces while *S. gordonii* was associated with gingival inflammation (**Fig. 3c** and **Supplementary**  
302 **Table 22**). Further adjustments for BMI, PPI and antibiotic treatment provided similar estimated

303 effects, indicating that these associations are independent of these factors (**Supplementary Table 23**).  
304 These findings showed a correlation between oral and gut microbiota, which may explain a migration  
305 of these species from the oral cavity to the gut. Furthermore, we observed four *Streptococcus* spp.  
306 associated with oral health, which may contribute to mechanisms underpinning the association  
307 between oral health and atherosclerosis process.

## 308 **Discussion**

309 Gut bacteria have been proposed to affect atherosclerosis progression and development through  
310 infections local or distal to the atherosclerotic plaque, or through production of metabolites affecting  
311 the atherosclerotic process<sup>2,29</sup>. The association of gut microbiota with coronary atherosclerosis has  
312 previously only been studied in symptomatic patients, who are often under treatment, resulting in high  
313 risk of bias. To address the previous biased sampling, we leveraged the large population-based  
314 SCAPIS cohort with detailed image-based measurements of coronary artery atherosclerosis, and deep  
315 characterization of the gut microbiome using shotgun metagenomics. We identified 73 species  
316 associated with CACS, with an enrichment of *Streptococcus* spp. and gene functions involved in  
317 amino acid and carbohydrate degradation. Our findings further supported that gut *Streptococcus* spp.  
318 were independently associated with endogenous and exogenous plasma metabolites, with  
319 inflammatory and infection markers, and with their bacterial homologues in the oral cavity, which  
320 were associated with worse oral health. Together, these findings provide robust evidence of the  
321 association of *Streptococcus* spp., with subclinical atherosclerosis and markers of systemic  
322 inflammation and infection, calling for studies to re-investigate the role of bacteria in atherosclerosis  
323 pathogenesis.

324 The *Streptococcus* genus was clearly enriched in the associations between species and CACS, in line  
325 with observations in earlier ACVD case-control studies<sup>7,13,14</sup>. Specifically, we observed *S. anginosus*,  
326 *S. oralis* subsp. *oralis*, *S. parasanguinis*, *S. gordonii*, *S. salivarius*, *S. mutans*, and *S. agalactiae*  
327 associated with increased CACS. These species commonly colonize the oropharyngeal cavity and the  
328 digestive tract<sup>30</sup> and all belong to the viridans streptococci group (VGS), except for *S. agalactiae* that

329 is a  $\beta$ -hemolytic non-VGS. An overview of the current knowledge of the involvement of these specific  
330 bacteria in cardiovascular pathologies is provided in **Supplementary Table 24**. VGS has the ability to  
331 infect the valves and the coronary vessels accounting for 20% of infective endocarditis cases, and they  
332 have been isolated from human coronary atherosclerotic plaque samples from coronary artery disease  
333 patients<sup>31–33</sup>. Some studies on animal models support a causal link between *Streptococcus* species and  
334 the atherosclerotic process<sup>3,34,35</sup>. For instance, atherosclerosis-prone mice orally challenged with *S.*  
335 *sanginius* had pro-inflammatory responses in the aorta, and accelerated atherosclerosis<sup>3</sup>. In the present  
336 study, we observed strong positive associations between abundance of CACS-associated  
337 *Streptococcus* species in the gut and hsCRP, leukocytosis and neutrophilia, which could have been  
338 triggered by low-grade bacteremia. Among patients with bacteremia, VGS is a common cause<sup>36,37</sup>.  
339 VGS species are early colonizers, and may contribute to or initiate biofilm formations. Biofilms are  
340 syntrophic beneficial poly-microbial communities that facilitate bacterial survival in aerobic  
341 environments such as the atherosclerotic plaque<sup>38</sup> and biofilms have been observed in atherosclerotic  
342 lesions associated with the fibrous cap<sup>39</sup>, however causal relationships are not clear. Both biofilms and  
343 VSG can induce persistent inflammation, attract monocytes into the endothelial space, and contribute  
344 to platelet aggregation, all of which are the requisites for promoting the atherosclerosis  
345 development<sup>40,41</sup>. Both local and distal infections require translocation of bacterial species to the  
346 bloodstream. In the oral cavity, VGS form biofilms on the tooth surface and they can enter to the  
347 bloodstream following mucosal barrier injuries, for example daily dental care activities, invasive  
348 dental procedures, and oral pathologies, which have been associated with increased risk of  
349 atherosclerosis, myocardial infarction, and stroke<sup>42–48</sup>. Our results indicated associations between the  
350 oral VGS and worse oral health, which can potentially be the entry point to the bloodstream.

351 A potential modifier of *Streptococcus* spp. abundance would be antimicrobial treatment. However,  
352 multiple clinical trials have demonstrated inefficacy of anti-infective therapies in mitigating  
353 atherosclerotic cardiovascular events<sup>49</sup>. The CLARICOR study<sup>50</sup>, in which patients with stable  
354 coronary artery disease were treated with clarithromycin, an antibiotic that can be used to treat  
355 *Streptococcus* spp. infections, reported increased mortality in the treatment arm. One possible

356 explanation for this lack of efficacy even though *Streptococcus* spp. would be causally related to  
357 atherosclerosis, could be the formation of *Streptococcus*-associated biofilms that increase the bacterial  
358 resistance to antibiotic treatment up to 1,000 times<sup>51</sup>, or alternatively, antibiotic treatment could lead to  
359 a recolonization of more pathogenic bacteria. Furthermore, the treatment window could exist much  
360 earlier in the atherosclerosis process. In the current study, the association between the *Streptococcus*  
361 spp. and calcification in the coronary arteries remained after exclusion of those participants treated  
362 with antibiotics the past year.

363 Additionally, gut microbiota composition could affect atherosclerosis development through effecting  
364 the host metabolism. We identified 1,412 associations between CACS-associated *Streptococcus*  
365 species in the gut and plasma metabolites, with an overrepresentation of associations with plasma bile  
366 acids, androgenic steroids, and sphingomyelins. Gut microbiota species are essential to transform  
367 primary bile acids to secondary bile acids that enter circulation and interact with host bile acid  
368 receptors. Knock-out mice of these receptors were shown to be protected against atherosclerosis  
369 development or progression<sup>52</sup>. Elevated plasma bile acids have also previously been associated with  
370 increased risk of coronary plaques in asymptomatic individuals<sup>53</sup>. However, other studies have  
371 reported a null or a protective role in symptomatic disease<sup>54,55</sup>.

372 *Streptococcus* spp. were also inversely associated with androgenic steroids and sphingomyelins.  
373 Androgenic steroids, which have a similar structure to bile acids, are recycled through enterohepatic  
374 circulation, which is partially regulated by gut microbiota<sup>56</sup>. Low levels of dehydroepiandrosterone  
375 (DHEA) have previously reported to associate with an increased risk of death caused by CVD in  
376 elderly men<sup>57</sup>. The role of sphingomyelins in the cardiovascular outcomes remains controversial. Some  
377 studies reported higher levels of sphingomyelin in coronary heart disease (CHD) patients compared to  
378 controls and these elevated levels were associated with earlier subclinical atherosclerosis<sup>58-61</sup>.  
379 However, other studies suggest that long-chain saturated sphingomyelins may protect from CHD  
380 incidence<sup>62</sup>, while follow-up studies indicated no association between plasma sphingomyelins and  
381 incidence of CHD<sup>63</sup>. Collectively, these observations show that *Streptococcus* spp. are correlated with  
382 many metabolites that were suggested in previous studies to be related to CVD.



383 There are some limitations in the current study. First, few participants presented high levels of  
384 subclinical atherosclerosis, and thus limiting statistical power, which was however counteracted by the  
385 size of the cohort analyzed that represents a population at least seven times larger than those analyzed  
386 previously. Second, microbial composition can vary extensively throughout the gastrointestinal tract  
387 and quantification of the microbial communities in fecal samples represents the microbial population  
388 at the distal colon, but does not comprise other sites<sup>64</sup> such as the small intestine, meaning that our  
389 study design might not allow discovery of species that are underrepresented in fecal samples. Third,  
390 we were unable to validate 64% of our findings in the discovery in the validation attempt. Here a more  
391 similar study of larger size would have been useful. As the validation was performed in a small case-  
392 control study of symptomatic disease, we could not determine whether the lack of replication for some  
393 of our findings was caused by lack of true association, lack of power, differences in study design,  
394 and/or due to cross-country differences. Fourth, our study does not take into consideration the different  
395 interactions among bacterial species such as synergistic effects in the relationship with coronary  
396 atherosclerosis. Finally, the cross-sectional study design prevented causal inferences. Different causal  
397 inference methods could be used in future studies to disentangle the underlying relationships and  
398 determine whether the identified species and suggested mediators are causally related to  
399 atherosclerosis development.

400 In conclusion, by combining data from a large population-based cohort study and highly accurate  
401 bioimaging to evaluate subclinical coronary atherosclerosis, we identified seven *Streptococcus* spp.  
402 associated with CACS, biomarkers of inflammation, and with their oral counterparts. These  
403 *Streptococcus* spp. may affect the atherosclerosis plaque development by direct infection or alteration  
404 of host metabolism. Future studies investigating the causal relationship in these associations will show  
405 whether these species can be used as potential biomarkers or treatment targets.

## 406 **Online Methods**

407 **Study design and participants.** SCAPIS was used as the primary data source. SCAPIS is a national  
408 Swedish general population study including 30,000 subjects aged 50–64 years, at six study sites,



409 focusing on phenotypes relevant to CVD, chronic obstructive pulmonary disease, and related  
410 metabolic disorders<sup>18</sup>. Participants from the Uppsala (n=4,541) and Malmö (n=4,432) centers were  
411 included in the present study after excluding 846 participants with prevalent CVD (self-reported  
412 myocardial infarction, angina, atrial fibrillation, heart valve disease, previous bypass surgery or  
413 percutaneous coronary intervention, revascularization of other arterial vessel, and stroke) before the  
414 baseline visit or missing information on country of birth or CACS. All participants gave written  
415 informed consent before participation. This investigation followed the principles expressed in the  
416 Declaration of Helsinki and was approved by the Swedish Ethical Review Authority  
417 (Etikprövningsmyndigheten Dnr 2010-228-31M, Dnr. 2018/315).

418 The results were validated in a published case-control study<sup>13</sup> of 214 cases and 171 controls of Han  
419 Chinese origin. The phenotypic data for the validation study are publicly available through the  
420 *curatedMetagenomicData* R package<sup>65</sup>. In this study, patients and controls aged 40–107 were recruited  
421 at the Medical Research Center of Guangdong General Hospital. Cases showed clinical manifestations  
422 of stable angina, unstable angina, or acute myocardial infarction. The diagnosis was confirmed by  
423 coronary angiography, and individuals with  $\geq 50\%$  stenosis in a single or multiple vessels were  
424 included in the study. At the time of medical examination, controls were free of any clinical symptom  
425 of ACVD including peripheral artery disease (coronary artery disease or myocardial infarction),  
426 cardiomyopathy, renal failure, peripheral neuropathy, systemic disease, and/or stroke<sup>13</sup>.

427 We investigated the association between *Streptococcus* spp. located in the gut and in the oral cavity in  
428 the MODS, a sub-study of MOS. MOS was performed in 2013–2021 including 5,259 adults (18–71  
429 years old), which consisted of children and grandchildren from participants examined at the baseline  
430 (1992–1996) of the Malmö Diet Cancer Study Cardiovascular Arm, and it aimed to identify gene-  
431 environment interactions of major diseases. The attendance rate of MOS was 47.9% and details of the  
432 study can be found in Brunkwall et al.<sup>66</sup>. Participants attending MOS 2014–2018 were eligible to  
433 participate in MODS (n=2,643) after the second visit in MOS. In total 831 individuals were recruited  
434 in MODS. The participants underwent a thorough dental examination including clinical examination,  
435 panoramic and bite-wing radiography. The Malmö Offspring Dental Study (MODS) was approved by

436 the Regional Ethics committee (Regionala etikprövningsnämnden, REPN) in Lund (Dnr 2013/761),  
437 which is part of the Malmö Offspring Study (MOS) with ethical approval from Regional Ethics  
438 committee (REPN) in Lund (Dnr 2012/594).

439 **CACS determination.** The total calcium score was measured in SCAPIS participants by summing the  
440 CACS in the left main coronary artery, anterior descending artery, circumflex artery, and right  
441 coronary artery. The specific methods for this measurement are available in Bergström et al.<sup>18</sup>.

442 **Carotid plaque assessment.** The numbers of plaques in the left and right carotid arteries were  
443 determined in SCAPIS participants from two-dimensional grey-scale ultrasound images obtained  
444 using a standardized protocol with a Siemens Acuson S2000 ultrasound scanner equipped with a 9L4  
445 linear transducer (both from Siemens, Germany) following the Mannheim consensus<sup>67</sup>. Carotid plaque  
446 presence was categorized in three categories. None: absence of identified plaques in both vessels;  
447 unilateral: identified plaques in one of the two vessels; and bilateral: identified plaques in both  
448 vessels<sup>18</sup>.

449 **Inflammation and infection markers.** Clinical chemistry, including hsCRP, was carried out on  
450 venous blood from SCAPIS participants. A blood cell count, including white blood cell differential,  
451 was also performed.

452 **Oral health phenotypes.** Five trained dentists performed the dental examination in MODS  
453 participants. Caries was detected using standard clinical criteria aided by mirror, probe (Hu-Friedy  
454 EXD57), and bite-wing radiographs. Cavitated lesions that extend into the dentin were recorded as  
455 manifest caries and a primary lesion not reaching the stage of manifest as initial. Initial and manifest  
456 lesions were summed for a combined variable of surfaces with caries. Filled surfaces included both  
457 fillings and crowns. Both caries and fillings were recorded on all teeth, counting five surfaces.  
458 Gingival inflammation was recorded as percentage of bleeding on probing excluding wisdom teeth  
459 and counting on six surfaces per tooth using a Hu-Friedy PCPUNC157 probe.

460 **Other phenotypes.** In SCAPIS the sociodemographic, lifestyle, health, and cardiovascular risk factor  
461 information were collected using validated and standardized questionnaires<sup>18</sup>. Self-reported

462 cardiovascular, Crohn’s, and ulcerative diseases, as well as self-reported medication for high blood  
463 pressure, dyslipidemia, and diabetes were categorized as binary variables. The recruitment center was  
464 also categorized as a binary variable (Malmö or Uppsala). Self-reported smoking was categorized as  
465 never, former, and current smoker. The participants were grouped into sedentary, moderate exercise,  
466 moderate but regular exercise, and regular exercise and training in leisure time categories according to  
467 self-reported physical activity. The participants’ country of birth was categorized as Scandinavia,  
468 Europe, Asia, and other. The Scandinavia group included participants who were born in Sweden,  
469 Denmark, Norway, or Finland. BMI was determined by dividing the weight (measured in kg) by the  
470 square of the height (measured in meters). The participants who received PPI drugs were classified  
471 into a binary category, using plasma metabolomics information. The participants who had measurable  
472 omeprazole and/or pantoprazole levels in the plasma over the detection limit were classified as PPI  
473 drug users. Total energy intake and fiber intake were derived from the food frequency questionnaire.  
474 Both variables were natural log-transformed. Participants who reported values of  $\ln(\text{total energy}$   
475  $\text{intake})$  over or below the geometric mean of  $\ln(\text{total energy intake}) \pm 3$  standard deviations in the  
476 population were excluded. Linkage with the drug prescription register was performed for antibiotic  
477 drug use (Anatomical Therapeutical Chemical code J01). Those participants who received a  
478 prescription for these drugs during the year preceding their attendance of the baseline visit were  
479 classified as participants with antibiotic drug treatment.

480 In the validation case-control study<sup>13</sup> , the sociodemographic information was collected using  
481 questionnaires. No information on Crohn’s and ulcerative diseases, cardiovascular medication, and  
482 physical activity was available. Smoking exposure was available only for 8.8% of the participants and  
483 none of them were under antibiotic treatment.

484 In the MOS population, the sociodemographic, lifestyle, and medication treatment were collected  
485 using validated and standardized questionnaires. Country of birth was categorized in two levels  
486 (Sweden or other) and self-reported information of the PPI was used. BMI was measured dividing the  
487 weight (measured in kg) by the square of the height (measured in meters). Participants belonging to  
488 the same family were registered in a variable called “family id”. For the participants included in

489 MODS, we obtained information using standardized questionnaires filled out during the dental  
490 examination. Smoking was categorized as never, former and current smoker. The participants were  
491 grouped in primary education, secondary education or university degree according to the level of  
492 education acquired. Self-reported information of the antibiotic usage was categorized as binary  
493 variable depending on if the participants received antibiotic treatment the last three months. The  
494 activity performed by the participant during the previous hour before attending the dental examination  
495 included three variables categorized as binary depending on whether the participant did or did not the  
496 following actions: eat, smoke, and/or brush their teeth. The oral hygiene was assessed using the Löe  
497 plaque index and the mean degree of plaque per tooth surface was calculated<sup>68</sup>. Therefore, we summed  
498 the number of surfaces with plaques identified during the dental exploration divided by the number of  
499 teeth multiplied by six surfaces.

500 **Metagenomics.** *General considerations.* For SCAPIS-Malmö and MOS samples, the whole analytical  
501 process was performed together in the project “lungut”, from DNA extraction to relative abundance  
502 calculation for each identified species, at Clinical Microbiomics A/S (Copenhagen, Denmark),  
503 following standardized methodology. The samples from lungut and SCAPIS-Uppsala were  
504 randomized on box-level (16 samples per box) and all the samples from these three studies were  
505 processed together during the years 2019 and 2020. MODS saliva samples were also carried out in the  
506 same company following the same pipeline during the year 2020, but it was not processed together  
507 with the three other studies. For the validation study<sup>13</sup>, the analytical pipeline for the metagenomics  
508 analysis from the FASTQ files to the relative abundance calculation for each identified species was  
509 also performed in Clinical Microbiomics A/S (Copenhagen, Denmark).

510 *Handling and analyses of SCAPIS, MOS and MODS.* Clinical Microbiomics A/S (Copenhagen,  
511 Denmark) processed three different projects that were: lungut (fecal samples from SCAPIS-Malmö  
512 and MOS samples), SCAPIS-Uppsala (fecal samples) and MODS (saliva samples). For lungut and  
513 SCAPIS-Uppsala, DNA was extracted from fecal samples using NucleoSpin® 96 Soil (Macherey-  
514 Nagel, Germany) from the same batch (Lot: 1903/001) to limit the technical bias. For MODS, DNA  
515 was extracted from 250 µL saliva using the same tools. At least one negative control (no sample

516 material) was included per batch of sample during the extraction process. One positive control (mock)  
517 was included per batch during the whole laboratory process for all the projects, including DNA  
518 sequencing. DNA extraction quality was evaluated using agarose gel electrophoresis and the quantity  
519 was determined by Qubit 2.0 fluorometer for the three projects. The genomic DNA was randomly  
520 sheared into fragments of approximately 350 bp. The fragmented DNA was used for library  
521 construction using NEBNext® Ultra Library Prep Kit for Illumina (New England Biolabs, MA, USA).  
522 The sample index pairs were unique for each sample per run. The prepared DNA libraries were  
523 purified using AMPure XP kit, and evaluated using Agilent 2100 Bioanalyzer to determine fragment  
524 size distribution. Before sequencing, the concentration of the final libraries were determined using  
525 quantitative real-time PCR. The libraries were sequenced using an Illumina Novaseq 6000 instrument  
526 using 2×150 bp paired-end reads. The sequencing process generated on average 26.3 million read pairs  
527 per sample in lungut, 25.3 million read pairs in SCAPIS-Uppsala and 26.3 million read pairs in  
528 MODS. Reads with >10% ambiguous bases, or >50% bases with Phred score (Qscore) <5 were  
529 removed. On average, 97.9% of the sequenced bases had a Qscore >20 in lungut, 97.8% in SCAPIS-  
530 Uppsala and 97.4% in MODS. Reads that mapped the human reference genome GRCh38 using  
531 Bowtie 2 v.02.3.4.1<sup>69</sup> (selecting default settings) were removed from FASTQ files. The remaining  
532 reads, classified as high-quality non-host reads (NQNH), were mapped to the gene catalog using BWA  
533 mem v.0.7.16a. The reads were considered mapped if the following criteria were met: an alignment of  
534  $\geq 100$  bases,  $\geq 95\%$  identity in this alignment, mapping quality (MAPQ)  $\geq 20$ , and  $\leq 10$  bases failing to  
535 align with the gene sequence at either end. Reads meeting previous criteria except the MAPQ  
536 threshold were considered multi-mapped. A gene count table was created with the number of mapped  
537 read pairs for each gene. Two specific gene catalogues were built. The first catalogue was built for the  
538 fecal samples including 6,813 samples from lungut, 4,876 from SCAPIS-Uppsala, 9,428 from Pasolli  
539 et al.<sup>70</sup>, and 3,486 publicly available genome assemblies for isolated microbial strains, selected for  
540 their relevance or potential relevance to the human gut or because they are used in commercially  
541 available mock microbial communities. The second catalogue was built for the saliva samples  
542 including 706 MODS samples, 1,305 oral samples compiled from 21 publicly available data sets, and  
543 1,326 publicly available genome assemblies from isolated microbial strains, selected for their

544 relevance or potential relevance to the human mouth, and 81 genome assemblies corresponding to  
545 commercially available mock microbial communities. The HQNH reads from the samples were  
546 assembled using MEGAHIT (v.1.1.1)<sup>71,72</sup> into contigs of  $\geq 500$  bp. The contigs from lungut, SCAPIS-  
547 Uppsala, Pasolli et al.<sup>70</sup>, and genome assemblies were combined, and genes were predicted using  
548 Prodigal Gene Prediction Software (v.2.6.3, metagenomics/anonymous mode; ;  
549 <https://github.com/hyattpd/Prodigal>). The contigs from MODS were combined with genome  
550 assemblies and genes were predicted using the same software. Genes and partial genes with a length  
551  $< 102$  bp were removed, resulting in a set of  $2.95 \times 10^9$  genes in the human gut catalogue and  $1.89 \times 10^8$   
552 genes in the human oral catalogue. For the human gut catalogue, the gene sequences were clustered  
553 using MMseqs2 (Release 11)<sup>73</sup> (“pre-clustered” at 98% identity over 95% coverage of the longer  
554 sequence ( $> 3$  kbp), followed by 93% identity over 70% coverage of the shorter sequence ( $\leq 3$  kbp)).  
555 For each cluster, a representative sequence was chosen based on the following criteria: first prioritize  
556 sequences derived from metagenome assembly (lungut, SCAPIS-Uppsala and Pasolli<sup>70</sup>) over those  
557 derived from isolated strain (genomes); then prioritize sequences representing the largest (cardinality)  
558 pre-cluster; then prioritize the longest sequence. The two sets of representative sequences were then  
559 re-clustered using the same criteria. The resulting sets of short and long cluster representatives were  
560 combined as follows: 1) All short cluster representatives were compared to all long cluster  
561 representatives and all alignments at 93% identity over 70% coverage of the shorter sequence were  
562 identified. 2) All genes that did not have an alignment were retained. 3) For genes that did have an  
563 alignment, the short gene but not the long gene were retained. The resulting set of 33.5 million  
564 sequences was then filtered to retain only sequences that represent a cluster with  $\geq 1$  reference-derived  
565 sequence and/or  $\geq 5$  metagenome-derived sequences, or must have been specifically selected for its  
566 relevance, e.g. as a pathogen or as a component of a mock community to build a non-redundant human  
567 gut gene catalog (version “HG3A”) of 14,147,921 microbial genes. For the human oral catalogue, the  
568 gene sequences were clustered using MMseqs2 (Release 11)<sup>73</sup> (“pre-clustered” at 93% identity over  
569 70% coverage of the longer sequence, followed by 93% identity over 70% coverage of the shorter  
570 sequence). We searched for alignments between long gene cluster representatives and short gene  
571 cluster representatives at 93 % identity over 70 % coverage of the shorter sequence; for all matches we

572 removed the long gene and retained the short gene. The merged long and short genes were filtered to  
573 remove sequences with tetramer entropy below 4, resulting in a non-redundant human oral gene  
574 catalog (version "Ho01") of 8,554,253 microbial genes.

575 Metagenomic species (MGS) core gene sets were defined as bins of co-abundant genes identified  
576 using gene abundances from the correspondent non-redundant gene catalog across the cohorts that  
577 passed the quality assessment according to Nielsen et al.<sup>74</sup>. Species abundance was estimated  
578 according to the signature gene set, which was assigned using 100 genes with the highest correlation  
579 to the median core gene abundance for each species. A table of species counts taking into account the  
580 total gene counts for the signature gene per species was created. A metagenomics species was  
581 considered detected if the read pairs were mapped to least three of the 100 signature genes. Species  
582 that did not fulfill this criterion were set to 0, resulting in a 99.6% of specificity, according to the  
583 internal benchmarks. The species count table was normalized for effective gene length (accounting for  
584 the read length). The relative abundance of each species was estimated normalizing it to the sum  
585 (100%). All analyses were performed at the species level.

586 For beta diversity analyses and the comparison of carriers and non-carriers between the two center  
587 sites, downsized MGS relative abundance data was used. The estimation of downsized MGS was  
588 performed by random sampling without replacement from the gene count table corresponding to the  
589 signature genes. Both lungut and SCAPIS-Uppsala were downsized to 210,430 reads. One sample  
590 from SCAPIS-Uppsala was discarded due to it presented only 1,473 reads mapped to the signature  
591 genes and downsizing all the samples to 1,473 reads would result in a huge loss of precision.

592 The taxonomical information was annotated after comparing all the genes on the two catalogues with  
593 NCBI RefSeq database<sup>75</sup> for archaea, bacterial, fungal, protozoa, and viral genomes, using BLAST  
594 algorithms. Human gut catalogue was compared with NCBI RefSeq downloaded on 02 May 2021 and  
595 the human oral catalogue was compared with the version downloaded on 27 January 2020. To  
596 annotate at the various taxonomic ranks, we required different levels of identity (95%, 95%, 85%,  
597 75%, 65%, 55%, 50% and 45% for subspecies, species, genus, family, order, class, phylum, and  
598 superkingdom, respectively) and a minimum of 80 % sequence coverage. If >75% of the MGS genes



599 mapped to a single species the MGS was annotated to this species. For genus, family, order, class and  
600 phylum the thresholds were set to 60%, 50%, 40%, 30% and 25% respectively. Furthermore, at genus  
601 and species level the MGS was not annotated to this level if >10% of the genes mapped an alternative  
602 species or genus.

603 The functional annotation was performed by comparing each gene in the catalog to the EggNOG (v.  
604 5.0)<sup>76</sup> orthologous groups database (<http://eggnogdb.embl.de/>) using EggNOG-mapper software (v.  
605 2.0.1)<sup>77</sup>. This comparison provided annotation to the Kyoto Encyclopedia of Genes and Genomes  
606 (KEGG) orthology (KO) database (<https://www.genome.jp/kegg/>). The functional potential profile  
607 was determined with GMM<sup>24</sup>, which includes 103 metabolic pathways that represent a cellular  
608 enzymatic process. MGS were assigned to a GMM if they contained at least two-thirds of the KOs  
609 required for the functionality of the module. If the module consisted of three or fewer steps, the MGS  
610 must contain all the steps. If the module contains alternative paths, the MGS only have to contain one  
611 of the paths.

612 For lungut, SCAPIS-Uppsala and MODS, no detectable levels of DNA were observed for negative  
613 controls, while detectable levels of DNA were observed for mock samples. The mock samples showed  
614 a coefficient of variation estimated by the Shannon diversity index of 3.30% in lungut and 3.05% in  
615 SCAPIS-Uppsala. The coefficient of variation for 158 pairs of biological replicates randomly  
616 introduced in the analysis in SCAPIS-Uppsala center (where Clinical Microbiomics was blind to this  
617 information) was 1.49%.

618 *Analyses of the validation study.* All the FASTQ files from the validation study were directly  
619 downloaded from the European Nucleotide Archive (ENA) under the project code “PRJEB21528”.  
620 The bioinformatics processing of reads, mapping to the catalogue, MGS count table generation and  
621 MGS relative abundance calculation steps were performed following the same algorithm used in the  
622 SCAPIS and MOS samples, with the exception of a minimum read-to-gene alignment length >90 bp to  
623 accommodate the 2X100 paired-end sequencing in the validation study.



624 **Metabolomics data.** Fasting plasma samples were stored at  $-80^{\circ}\text{C}$  until they were processed by  
625 Metabolon Inc (Durham, NC, USA), as described by Evans et al.<sup>78</sup>. The order of the SCAPIS samples  
626 were randomized and they were analyzed together with quality control standards including pure water,  
627 solvents used for metabolite extraction and a pool of human samples maintained by Metabolon Inc  
628 (Durham, NC, USA). Proteins from these samples were removed by precipitating them adding  
629 methanol and applying vigorous shanking using Glem Mills GenoGrinder 200 and centrifugation. The  
630 metabolite identification was carried out under different settings using Waters ACQUITY ultra-  
631 performance liquid chromatography (UPLC) and a Thermo Scientific Q-Exactive high  
632 resolution/accurate mass spectrometer (MS) interfaced with a heated electrospray ionization (HESI-II)  
633 source and Orbitrap mass analyzer operated at 35,000 mass resolution. The settings were a reverse  
634 phase (RP)/UPLC-MS/MS method with positive-ion mode electrospray ionization (ESI), a RP/UPLC-  
635 MS/MS with negative ion mode ESI, and a Hydrophilic interaction (HILIC)/UPLC-MS/MS with  
636 negative ion mode. Then, Metabolon's hardware and software were used to extract the raw data,  
637 identify the peaks, and process the specific quality controls. The peak measurement areas for each  
638 metabolite were divided by the median peak area of samples in that batch ( $n=144$ ). The compounds  
639 were identified by comparison to Metabolon library, which contains over 3,300 commercially purified  
640 standards and recurrent unknown entities. Metabolite quantification was performed according to the  
641 area-under-the-curve quantification of the corresponding peaks. For each metabolite, if the metabolite  
642 measurement failed to reach the detection threshold were imputed from the minimum observed value  
643 for that metabolite. Each metabolite was assigned to a superpathway, which includes broad metabolic  
644 pathway terms, and a subpathway, which includes narrow metabolic pathway terms, during the  
645 annotation process. Drug metabolites were categorized as binary variables and the remaining  
646 metabolites were natural log plus one ( $\ln+1$ ) transformed.

647 **Statistical analysis.** *Simulation to determine the main statistical model.* The statistical method for the  
648 models in which CACS was the outcome was selected from simulation data. The simulated dataset  
649 was built by shuffling randomly the first delivered data ( $n=438$ ) to simulate the null hypothesis. We  
650 ran 12 models using different transformations in CACS and in microbial species: Linear model with

651 ln+1 transformation on CACS and microbial species; linear model with bootstrapping standard errors  
652 with ln+1 transformation on CACS and microbial species; linear model with bootstrapping based on  
653 the residuals with ln+1 transformation on CACS and microbial species; linear model using robust  
654 standard errors with ln+1 transformation on CACS and microbial species; linear model with ln+1 on  
655 CACS and a center log ratio transformation on the species; negative binomial model with  
656 bootstrapping standard errors with ln+1 transformation on the microbial species; negative binomial  
657 model with ln+1 transformation on microbial species; negative binomial model with center log  
658 transformation on the microbial species; hurdle negative model in which we applied a logistic  
659 regression in the zero part of the hurdle negative model and a negative binomial model in the count  
660 part of the hurdle negative binomial model with the species ln+1 transformed; spearman correlation;  
661 ordinal regression with a ln+1 transformation on the microbial species; and a two-step model, in which  
662 logistic regression was first applied, followed by a negative binomial for CACS>0 with a ln+1  
663 transformed species. The final model was selected according to the performance in the simulation  
664 based on the inflation factor and prioritizing methods that allow investigating the associations, in  
665 accordance with the hypothetical causal diagram created using DAGitty ([www.dagitty.net](http://www.dagitty.net); **Extended**  
666 **Data Fig. 1**) (regression over correlation), and easy interpretation. The linear model using ln+1  
667 transformation in CACS and in the gut microbiota species performed well and it was one of the easiest  
668 regression methods for result interpretation.

669 *Association between gut microbiota diversity and atherosclerosis.* Alpha and beta diversity were  
670 estimated using the R package *vegan*<sup>79</sup>. Alpha diversity was assessed using Shannon diversity index  
671 and beta diversity using Bray Curtis dissimilarity. For alpha diversity, we fitted linear regression  
672 model using CACS as the outcome and adjusting the model for age, sex, country of birth, and  
673 technical variables including center site and metagenomics extraction plate within each center site (we  
674 included an indicator variable for center site and interaction terms between metagenomics extraction  
675 plate and center site, but no main effect for metagenomics extraction plate (since this would be  
676 redundant)). We further adjusted this model for smoking, physical activity, dietary indicators, and self-  
677 reported medication for dyslipidemia, hypertension and/or diabetes. For beta diversity, we performed

678 PERMANOVA analyses with 9,999 permutations and assessing the marginal effects of the terms with  
679 beta-diversity as the outcome in the model. The independent variable was the four categories of CACS  
680 and the models were adjusted for the same two set of covariates used in the alpha diversity analyses.  
681 Pairwise comparisons were carried out using PERMANOVA models. Multiple testing was adjusted  
682 for using 5% Benjamini-Hochberg FDR.

683 *Association between gut microbiota species and coronary atherosclerosis.* In the discovery cohort, a  
684 series of linear multivariable regressions using ln+1 of CACS as the dependent variable and ln+1 of  
685 the 1,985 microbial species as independent variable. We fitted a model for each species separately.  
686 Two sets of covariates were selected according to the assumptions of the causal framework (**Extended**  
687 **Data Fig. 1**). The basic model was adjusted for age, sex, country of birth, and technical variables  
688 including center site, metagenomics extraction plate within each center site and Shannon diversity  
689 index. The full model was additionally adjusted for smoking, physical activity, ln(total energy intake),  
690 ln(fiber intake), and medication (self-reported medication prescribed for dyslipidemia, high blood  
691 pressure, and/or diabetes). Multiple testing was adjusted for using 5% Benjamini-Hochberg FDR. The  
692 analyses were performed jointly as well as sex-stratified. To test if the estimate effects were different  
693 in the sex-stratified analyses the Cochran's Q-test was used.

694 We used GSEA from the *fgsea* R package<sup>80</sup> to determine whether species associated with CACS were  
695 enriched for certain genera. This statistical method was applied on the ranked p-values for positive and  
696 negative regression coefficients separately of the associations between species and the phenotype of  
697 interest in the basic model. The enrichment p-values were controlled using 5% Benjamini-Hochberg  
698 FDR.

699 *Sensitivity analysis.* Analyses for species significantly associated with CACS were repeated without  
700 adjusting for Shannon diversity index. The analyses were also repeated including BMI and PPI drugs  
701 as additional covariates in the full model. The full model was also fitted additionally adjusting for  
702 traditional cardiovascular risk factors (BMI, diabetes, systolic blood pressure, diastolic blood pressure,  
703 total cholesterol, cholesterol in low-density lipoproteins, and cholesterol in high-density lipoproteins)  
704 to test if the effect of the gut microbiota species on coronary atherosclerosis was independent of these

705 traditional cardiovascular risk factors. We also performed sensitivity analyses excluding data for  
706 participants with Crohn's disease, ulcerative disease and for participants who underwent antibiotic  
707 treatment during the year preceding their attending the baseline visit. The associations from the main  
708 analysis (basic and full model using linear regression) were tested using partial Spearman correlations  
709 to ensure consistency using different statistical methods. In case of a discrepancy between the main  
710 model (linear regression) and the sensitivity model (Spearman correlation) a study of influential  
711 observations that may drive the linear association was performed by calculating unscaled dfbeta  
712 values. If the most influential observation had higher dfbeta values compared to the regression  
713 coefficient and the values were in the same direction as the regression coefficient, the finding from the  
714 linear regression was deemed unreliable. The residuals from the association between the species  
715 considered as reliable and CACS using linear regression were plotted against the exposure to identify  
716 any trend between the two variables.

717 *Association between gut microbiota species and carotid atherosclerosis.* To assess the association  
718 between CACS-related species and carotid atherosclerosis, a series of ordinal multivariable  
719 regressions were performed using the presence of carotid plaque as the dependent variable for carotid  
720 atherosclerosis and the microbiota species significantly associated with CACS as the independent  
721 variable including only one species in each model. The relative abundance of these species were  $\ln+1$   
722 transformed. The models were adjusted using the covariates in the basic and full model. Multiple  
723 testing was adjusted using 5% Benjamini-Hochberg FDR.

724 *Validation in a case-control study with symptomatic atherosclerotic cardiovascular patients.*  
725 Multivariable logistic regressions were fitted with disease status as the binary outcome. The exposure  
726 variables were the species with adjusted p-value  $<0.05$  from the basic model used in the discovery  
727 cohort that were available in the validation dataset. We did a rank-based inverse normal transformation  
728 of the relative abundance of these species for the analysis. The models were adjusted for age, sex and  
729 Shannon diversity index. Those associations with a p-value adjusted for Benjamini-Hochberg  $<0.05$   
730 and showing an effect in the same direction as we observed in the discovery cohort were considered as  
731 validated.

732 *Functional analysis based on gut metabolic modules.* GSEA was used to assess if species belonging to  
733 a specific functional GMM were enriched in their association with CACS compared to species in the  
734 other functional models. The analysis was performed on ranked p-values for positive and negative  
735 regression coefficients separately, and controlled using 5% Benjamini–Hochberg FDR. To determine  
736 if these results were driven by an enrichment of species belonging to a same genus we carried out a  
737 repeated GSEA but applying a leave-one-(taxon)-out in the analysis, which consist in removing the  
738 species belonging to one genus each time.

739 *Associations between Streptococcus spp. and plasma metabolites.* Partial Spearman correlations were  
740 fitted using the R package *ppcor*<sup>81</sup> to assess the correlations between the significant CACS-associated  
741 *Streptococcus* spp. with plasma metabolites controlling for multiple testing using 5% Benjamini–  
742 Hochberg FDR. The models were adjusted using the same covariates as previously defined in the full  
743 model. GSEA was also performed on ranked p-values for positive and negative correlation coefficients  
744 separately to evaluate if the streptococci associated with plasma metabolites were enriched for certain  
745 metabolite subpathway. The enriched p-values were controlled using 5% Benjamini-Hochberg FDR.  
746 To investigate the possible mediation effect of these metabolites in the association between  
747 *Streptococcus* spp. and CACS we additionally adjusted the full model for metabolites involved in  
748 enriched subpathways with <30% missing values and adjusted p-value <0.05.

749 *Associations between Streptococcus spp. and systemic inflammatory and infection biomarkers.* A  
750 series of linear multivariable regressions were fitted to assess the association between CACS-related  
751 *Streptococcus* spp. (independent variable) and hsCRP and counts of neutrophils and leukocytes  
752 (outcomes) controlling for multiple testing using Benjamini-Hochberg at 5% FDR level. The relative  
753 abundance of these species were ln+1 transformed, while the outcome variables were natural log  
754 transformed. The models were adjusted for the same covariates as the full model. These models further  
755 adjusted for BMI and PPI were also performed.

756 *Associations between gut and oral Streptococcus spp. and between oral Streptococcus spp. and oral*  
757 *health phenotypes.* To investigate the association between CACS-related *Streptococcus* spp. in the gut  
758 with their homologue in the oral cavity, a series of partial Spearman correlation with cluster-robust

759 standard errors (family id as a cluster) were fitted adjusted for age, sex, country of birth and gut  
760 metagenomics extraction plate. The models were not adjusted for oral metagenomics extraction plate  
761 because previous quality controls showed no significant effect from the plate on the oral microbiome.  
762 The oral *Streptococcus* spp. associated with an adjusted p-value <0.05 with their homologue in the gut  
763 were then associated with three oral health phenotypes consisting of filling surfaces, caries and  
764 gingival inflammation using ordinal regressions. The oral health phenotypes were the dependent  
765 variable in the regressions and the ln+1 transformation of the relative abundance of the *Streptococcus*  
766 spp. the independent variable. These ordinal regression with cluster-robust standard errors (family id  
767 as a cluster) were adjusted for age, sex, smoking, education, oral hygiene, activity realized the hour  
768 before attending to the dental examination, and oral Shannon diversity index. The models were  
769 additionally adjusted for BMI, PPI and antibiotic treatment. A 5% Benjamini–Hochberg FDR was  
770 applied to denote statistical significance in the analyses.

#### 771 **Data availability.**

772 The availability of individual data are limited due to the sensitive nature of the data and it can only be  
773 used with previous ethical approval. Therefore, the metagenomics sequences has been anonymized  
774 and they are available in ENA under accession code “PRJEB51353”. A subset of anonymized  
775 metabolomics data (n=125) is available in MetaboLights under the study identifier “MTBLS407”.  
776 However, all the data used in this work is available from the authors upon reasonable request and with  
777 previous written permission from the Swedish Ethical Review Authority and the SCAPIS Data Access  
778 Board.

#### 779 **Code availability.**

780 The source code used to generate the results for the analysis is available at  
781 <https://github.com/MolEpicUU/GUTSY-CACS>.

#### 782 **Acknowledgements**

783 The main financial support for the study was from the European Research Council (ERC-2018-STG-  
784 801965 (TF); ERC-CoG-2014-649021 (MO-M) and ERC-STG-2015-679242 (JGS)). Further funding

785 was also provided from the Swedish Research Council (VR 2019-01471 (TF), 2018-02784 (MO-M),  
786 2018-02837 (MO-M), 2019-01015 (JÄ), 2020-00243 (JÄ), 2019-01236 (GE), 2017-02554 (JGS); and  
787 EXODIAB 2009-1039 (MO-M)); the Swedish Heart-Lung Foundation [Hjärt-Lungfonden 20190505  
788 (TF), 20200711 (MO-M), 20180343 (JÄ), 2019-0526 (JGS), 20200173 (GE)]; the A.L.F.  
789 governmental grant (2018-0148 (MO-M)); the Novo Nordisk Foundation (NNF20OC0063886 (MO-  
790 M)); the Swedish Diabetes Foundation (DIA 2018-375 (MO-M)); the Swedish Foundation for  
791 Strategic Research (LUDC-IRC 15-0067 (MO-M)); Formas (2020-00989 (SA)); Göran Gustafsson  
792 foundation [2016 (TF)]; and Axel and Signe Lagerman's foundation (TF),

793 The main funding body of The Swedish CARDioPulmonary bioImage Study (SCAPIS) is the Swedish  
794 Heart-Lung Foundation. The study is also funded by the Knut and Alice Wallenberg Foundation; the  
795 Swedish Research Council and VINNOVA (Sweden's Innovation agency); the University of  
796 Gothenburg and Sahlgrenska University Hospital; Karolinska Institutet and Stockholm County  
797 Council; Linköping University and University Hospital; Lund University and Skåne University  
798 Hospital; Umeå University and University Hospital; and Uppsala University and University Hospital.

799 The main funding body of Malmö Offspring Dental Study (MODS) was Oral Health Related Research  
800 by Region Skåne (OFRS 422361, OFRS 512951, OFRS 567711, OFRS 655561, OFRS 752071, OFRS  
801 853031, OFRS 931171 and OFRS968144). The Malmö Offspring Study (MOS) has been funded by  
802 the Research Council of Sweden (VR 521-2013-2756 (PMN)), the Swedish Heart and Lung  
803 Foundation [Hjärt-Lungfonden 20150427 (PMN)], and by funds ("ALF") obtained from the local  
804 Region Skåne County Council (PMN). In addition, funding has been obtained from Ernhöld  
805 Lundströms Stiftelse (LB).

806 The computations and data handling were enabled by resources provided by the Swedish National  
807 Infrastructure for Computing (SNIC) at Uppsala University (SNIC CENTRE) partially funded by the  
808 Swedish Research Council through grant agreement no. 2018-05973. The computations were  
809 performed using resources provided by SNIC through Uppsala Multidisciplinary Center for Advanced  
810 Computational Science (UPPMAX) under Project SNIC sens2019512.



## 811 **Author contributions**

812 SA, DJ, GE, JGS, JÄ, MO-M and TF obtained the financial support for the study. SS-B, KFD, UH,  
813 JÄ, MO-M and TF planned and designed the study. LB, AM, LL, GöB, JS, JÄ, GE, JGS, JS, MO-M  
814 and TF collected the SCAPIS data. LB, PMN, GE and MO-M collected the MOS data. DJ, BK and  
815 DE planned and collected MODS data. SP, NN, ACE, JBH, HBN preprocessed samples and data and  
816 carried out the metagenomics bioinformatics analyses. SS-B prepared the R scripts and carried out all  
817 the associations. SS-B, KFD, DN, DJ, JÄ, MO-M and TF wrote the manuscript. SS-B, GaB and GV  
818 created the figures. All authors contributed with the critical interpretation of the results and the  
819 manuscript.

## 820 **Competing interest statement**

821 The authors declare the following competing interests: S.P, N.N., A.E., J.B.H. and H.B.N. are  
822 employees for the company Clinical Microbiomics A/S, where the sample processing has been  
823 performed from DNA extraction to the estimations of relative abundance for the metagenomics  
824 species. J. Ä. has received lecture fees from Novartis and AstraZeneca, and served on advisory boards  
825 for AstraZeneca and Boehringer Ingelheim, all unrelated to the present paper. PMN has received  
826 lecture fees from Novartis, Novo Nordisk, Amgen and Boehringer Ingelheim unrelated to the present  
827 paper. The other authors declare no competing interests.

## 828 **References**

- 829 1. Roth, G. A. *et al.* Global Burden of Cardiovascular Diseases and Risk Factors, 1990-2019:  
830 Update From the GBD 2019 Study. *Journal of the American College of Cardiology* **76**, 2982–  
831 3021 (2020).
- 832 2. Jonsson, A. L. & Bäckhed, F. Role of gut microbiota in atherosclerosis. *Nature Reviews*  
833 *Cardiology* **14**, 79–87 (2017).
- 834 3. Hashizume-Takizawa, T. *et al.* Oral challenge with *Streptococcus sanguinis* induces aortic  
835 inflammation and accelerates atherosclerosis in spontaneously hyperlipidemic mice.  
836 *Biochemical and Biophysical Research Communications* **520**, 507–513 (2019).
- 837 4. Ley, R. E., Turnbaugh, P. J., Klein, S. & Gordon, J. I. Microbial ecology: Human gut microbes  
838 associated with obesity. *Nature* **444**, 1022-1023 (2006).



- 839 5. Pedersen, H. K. *et al.* Human gut microbes impact host serum metabolome and insulin  
840 sensitivity. *Nature* **535**, 376–381 (2016).
- 841 6. Wang, J. *et al.* A metagenome-wide association study of gut microbiota in type 2 diabetes.  
842 *Nature* **490**, 55–60 (2012).
- 843 7. Liu, S., Zhao, W., Liu, X. & Cheng, L. Metagenomic analysis of the gut microbiome in  
844 atherosclerosis patients identify cross-cohort microbial signatures and potential therapeutic  
845 target. *FASEB Journal* **34**, 14166–141681 (2020).
- 846 8. Aryal, S., Alimadadi, A., Manandhar, I., Joe, B. & Cheng, X. Machine learning strategy for gut  
847 microbiome-based diagnostic screening of cardiovascular disease. *Hypertension* **76**, 1555–  
848 1562 (2020).
- 849 9. Liu, F. *et al.* Alterations of Gut Microbiome in Tibetan Patients With Coronary Heart Disease.  
850 *Frontiers in Cellular and Infection Microbiology* **10**, 373 (2020).
- 851 10. Zheng, Y. Y. *et al.* Gut Microbiome-Based Diagnostic Model to Predict Coronary Artery  
852 Disease. *Journal of Agricultural and Food Chemistry* **68**, 3548–57 (2020).
- 853 11. Toya, T. *et al.* Coronary artery disease is associated with an altered gut microbiome  
854 composition. *PLoS ONE* **15**, e0227147 (2020).
- 855 12. Liu, Z. *et al.* The intestinal microbiota associated with cardiac valve calcification differs from  
856 that of coronary artery disease. *Atherosclerosis* **284**, 121–8 (2019).
- 857 13. Jie, Z. *et al.* The gut microbiome in atherosclerotic cardiovascular disease. *Nature*  
858 *Communications* **8**, 845 (2017).
- 859 14. Liu, H. *et al.* Alterations in the gut microbiome and metabolism with coronary artery disease  
860 severity. *Microbiome* **7**, 68 (2019).
- 861 15. Fromentin, S. *et al.* Microbiome and metabolome features of the cardiometabolic disease  
862 spectrum. *Nature Medicine* **2022** **37**, 1–12 (2022).
- 863 16. Karlsson, F. H. *et al.* Symptomatic atherosclerosis is associated with an altered gut  
864 metagenome. *Nature Communications* **3**, 1245–1253 (2012).
- 865 17. Sattar, N. & Preiss, D. Reverse Causality in Cardiovascular Epidemiological Research: More  
866 Common Than Imagined? *Circulation* **135**, 2369–2372 (2017).
- 867 18. Bergström, G. *et al.* The Swedish CARDioPulmonary BioImage Study: Objectives and design.  
868 *Journal of Internal Medicine* **278**, 645–659 (2015).
- 869 19. Bergström, G. *et al.* Prevalence of Subclinical Coronary Artery Atherosclerosis in the General  
870 Population. *Circulation* **144**, 916–929 (2021).
- 871 20. Li, R. *et al.* B-Mode-Detected Carotid Artery Plaque in a General Population. Atherosclerosis  
872 Risk in Communities (ARIC) Study Investigators. *Stroke* **25**, 2377–2383 (1994).
- 873 21. Gepner, A. D. *et al.* Comparison of Coronary Artery Calcium Presence, Carotid Plaque  
874 Presence, and Carotid Intima-Media Thickness for Cardiovascular Disease Prediction in the  
875 Multi-Ethnic Study of Atherosclerosis. *Circulation: Cardiovascular Imaging* **8**, e002262 (2015).
- 876 22. Persson, M. *et al.* Soluble urokinase plasminogen activator receptor: a risk factor for carotid  
877 plaque, stroke, and coronary artery disease. *Stroke* **45**, 18–23 (2014).

- 878 23. Sturlaugsdottir, R. *et al.* Prevalence and determinants of carotid plaque in the cross-sectional  
879 REFINE-Reykjavik study. *BMJ Open* **6**, e012457 (2016).
- 880 24. Vieira-Silva, S. *et al.* Species-function relationships shape ecological properties of the human  
881 gut microbiome. *Nature Microbiology* **1**, 16088 (2016).
- 882 25. Lemos, J. A. *et al.* The Biology of *Streptococcus mutans*. *Microbiology Spectrum* **7** (2019).
- 883 26. Iturriaga, G., Suárez, R. & Nova-Franco, B. Trehalose Metabolism: From Osmoprotection to  
884 Signaling. *International Journal of Molecular Sciences* **10**, 3793–3810 (2009).
- 885 27. Lè Ne Tournu, H., Fiori, A. & Dijck, P. van. Relevance of Trehalose in Pathogenicity: Some  
886 General Rules, Yet Many Exceptions. *PLoS Pathogens* **9**, e1003447 (2013).
- 887 28. Jönsson, D. *et al.* Periodontal disease is associated with carotid plaque area: the Malmö  
888 Offspring Dental Study (MODS). *Journal of Internal Medicine* **287**, 301–309 (2020).
- 889 29. Ma, J. & Li, H. The Role of Gut Microbiota in Atherosclerosis and Hypertension. *Frontiers in*  
890 *Pharmacology* **9**, 1082 (2018).
- 891 30. Doern, C. D. & Burnham, C.-A. D. It's Not Easy Being Green: the Viridans Group Streptococci,  
892 with a Focus on Pediatric Clinical Manifestations. *Journal of Clinical Microbiology* **48**, 3829  
893 (2010).
- 894 31. Ott, S. J. *et al.* Detection of diverse bacterial signatures in atherosclerotic lesions of patients  
895 with coronary heart disease. *Circulation* **113**, 929–937 (2006).
- 896 32. Koren, O. *et al.* Human oral, gut, and plaque microbiota in patients with atherosclerosis.  
897 *Proceedings of the National Academy of Sciences* **108**, 4592–4598 (2011).
- 898 33. Viehman, J. A. *et al.* Chapter 3 - Microbiology of endocarditis. in *Infective Endocarditis* 43-59  
899 (ed. Kilic A, 2022).
- 900 34. Kesavalu, L. *et al.* Increased atherogenesis during *Streptococcus mutans* infection in ApoE-null  
901 mice. *Journal of Dental Research* **91**, 255–260 (2012).
- 902 35. Brandsma, E. *et al.* A Proinflammatory Gut Microbiota Increases Systemic Inflammation and  
903 Accelerates Atherosclerosis. *Circulation Research* **124**, 94–100 (2019).
- 904 36. Razonable, R. R. *et al.* Bacteremia due to viridans group streptococci with diminished  
905 susceptibility to levofloxacin among neutropenic patients receiving levofloxacin prophylaxis.  
906 *Clinical Infectious Diseases* **34**, 1469–1474 (2002).
- 907 37. Chia, J. S. *et al.* Induction of Cytokines by Glucosyltransferases of *Streptococcus mutans*.  
908 *Clinical and Diagnostic Laboratory Immunology* **9**, 892-897 (2002).
- 909 38. Chhibber-Goel, J. *et al.* Linkages between oral commensal bacteria and atherosclerotic  
910 plaques in coronary artery disease patients. *npj Biofilms and Microbiomes* **2**, 7 (2016).
- 911 39. Lanter, B. B. & Davies, D. G. *Propionibacterium acnes* recovered from atherosclerotic human  
912 carotid arteries undergoes biofilm dispersion and releases lipolytic and proteolytic enzymes in  
913 response to norepinephrine challenge In vitro. *Infection and Immunity* **83**, 3960–3971 (2015)
- 914 40. Nagata, E., de Toledo, A. & Oho, T. Invasion of human aortic endothelial cells by oral viridans  
915 group streptococci and induction of inflammatory cytokine production. *Molecular Oral*  
916 *Microbiology* **26**, 78–88 (2011).

- 917 41. Snow, D. E. *et al.* The presence of biofilm structures in atherosclerotic plaques of arteries from  
918 legs amputated as a complication of diabetic foot ulcers. *Journal Wound Care* **25**, S16–S22  
919 (2016).
- 920 42. Leishman, S. J., Do, H. L. & Ford, P. J. Cardiovascular disease and the role of oral bacteria.  
921 *Journal of Oral Microbiology* **2** (2010).
- 922 43. Nakano, K. & Ooshima, T. Common knowledge regarding prevention of infective endocarditis  
923 among general dentists in Japan. *Journal of Cardiology* **57**, 123–130 (2011).
- 924 44. Yumoto, H. *et al.* The Pathogenic Factors from Oral Streptococci for Systemic Diseases.  
925 *International Journal of Molecular Sciences* **20**, 4571 (2019).
- 926 45. Nomura, R. *et al.* Contribution of Severe Dental Caries Induced by *Streptococcus mutans* to  
927 the Pathogenicity of Infective Endocarditis. *Infection and Immunity* **88**, e00897 (2020).
- 928 46. Kim, K. *et al.* Severity of dental caries and risk of coronary heart disease in middle-aged men  
929 and women: a population-based cohort study of Korean adults, 2002–2013. *Scientific Reports*  
930 **9**, 1–7 (2019).
- 931 47. Kilian, M. Streptococcus and enterococcus: Pharyngitis; scarlet fever; skin and soft tissue  
932 infections; streptococcal toxic shock syndrome; pneumonia; meningitis; urinary tract  
933 infections; rheumatic fever; post-streptococcal glomerulonephritis. in *Medical Microbiology:*  
934 *Eighteenth Edition* 183–198 (Elsevier Inc., 2012).
- 935 48. Rafferty, B. *et al.* Impact of monocytic cells on recovery of uncultivable bacteria from  
936 atherosclerotic lesions. *Journal of Internal Medicine* **270**, 273–280 (2011).
- 937 49. Sethi, N., Safi, S., Korang, S. & Hróbjartsson, A. Antibiotics for secondary prevention of  
938 coronary heart disease. *Cochrane Database Systemic Reviews* **2021**, CD003610 (2021).
- 939 50. Jespersen, C. M. Randomised placebo controlled multicentre trial to assess short term  
940 clarithromycin for patients with stable coronary heart disease: CLARICOR trial. *British Medical*  
941 *Journal* **332**, 22–24 (2006).
- 942 51. Sharma, D. & Khan, A. U. Antibiotics versus biofilm: an emerging battleground in microbial  
943 communities. *Antimicrobial Resistance and Infection Control* **8**, 76 (2019).
- 944 52. Brown, J. M. & Hazen, S. L. Microbial modulation of cardiovascular disease. *Nature Reviews*  
945 *Microbiology* **16**, 171–181 (2018).
- 946 53. Zhang, B. C. *et al.* Increased serum bile acid level is associated with high-risk coronary artery  
947 plaques in an asymptomatic population detected by coronary computed tomography  
948 angiography. *Journal of Thoracic Disease* **11**, 5063–5070 (2019).
- 949 54. Steiner, C. *et al.* Bile Acid Metabolites in Serum: Intraindividual Variation and Associations  
950 with Coronary Heart Disease, Metabolic Syndrome and Diabetes Mellitus. *PLOS ONE* **6**,  
951 e25006 (2011).
- 952 55. Charach, G. *et al.* The association of bile acid excretion and atherosclerotic coronary artery  
953 disease. *Therapeutic Advances in Gastroenterology* **4**, 95 (2011).
- 954 56. Cross, T. W. L., Kasahara, K. & Rey, F. E. Sexual dimorphism of cardiometabolic dysfunction:  
955 Gut microbiome in the play? *Molecular Metabolism* **15**, 70-81 (2018).

- 956 57. Ohlsson, C., Vandenput, L. & Tivesten. DHEA and mortality: What is the nature of the  
957 association? *The Journal of Steroid Biochemistry and Molecular Biology* **145**, 248–253 (2015).
- 958 58. Poss, A. M. *et al.* Machine learning reveals serum sphingolipids as cholesterol-independent  
959 biomarkers of coronary artery disease. *The Journal of Clinical Investigation* **130**, 1363–1376  
960 (2020).
- 961 59. Ganna, A. *et al.* Large-scale Metabolomic Profiling Identifies Novel Biomarkers for Incident  
962 Coronary Heart Disease. *PLOS Genetics* **10**, e1004801 (2014).
- 963 60. Ottosson, F. *et al.* A plasma lipid signature predicts incident coronary artery disease.  
964 *International Journal of Cardiology* **331**, 249–254 (2021).
- 965 61. Nelson, J. C., Jiang, X. C., Tabas, I., Tall, A. & Shea, S. Plasma sphingomyelin and subclinical  
966 atherosclerosis: findings from the multi-ethnic study of atherosclerosis. *American Journal of*  
967 *Epidemiology* **163**, 903–912 (2006).
- 968 62. Sigruener, A. *et al.* Glycerophospholipid and Sphingolipid Species and Mortality: The  
969 Ludwigshafen Risk and Cardiovascular Health (LURIC) Study. *PLOS ONE* **9**, e85724 (2014).
- 970 63. Yu, Z., Peng, Q. & Huang, Y. Potential therapeutic targets for atherosclerosis in sphingolipid  
971 metabolism. *Clinical Science* **133**, 763 (2019).
- 972 64. S Leite, G. G. *et al.* Mapping the Segmental Microbiomes in the Human Small Bowel in  
973 Comparison with Stool: A REIMAGINE Study. *Digestive Diseases and Sciences* **65**, 2595–2604  
974 (2020).
- 975 65. Pasolli, E. *et al.* Accessible, curated metagenomic data through ExperimentHub. *Nature*  
976 *Methods* **14**, 1023–24 (2017).
- 977 66. Brunkwall, L. *et al.* The Malmö Offspring Study (MOS): design, methods and first results.  
978 *European Journal of Epidemiology* **36**, 103–116 (2021).
- 979 67. Touboul, P. J. *et al.* Mannheim Carotid Intima-Media Thickness and Plaque Consensus (2004–  
980 2006–2011): An Update on Behalf of the Advisory Board of the 3rd and 4th Watching the Risk  
981 Symposium 13th and 15th European Stroke Conferences, Mannheim, Germany, 2004, and  
982 Brussels, Belgium, 2006. *Cerebrovascular Disease* **34**, 290 (2012).
- 983 68. Løe, H. The Gingival Index, the Plaque Index and the Retention Index Systems. *The Journal of*  
984 *Periodontology* **38**, 610–616 (1967).
- 985 69. Langmead, B. & Salzberg, S. L. Fast gapped-read alignment with Bowtie 2. *Nature Methods*  
986 *2012 9:4* **9**, 357–359 (2012).
- 987 70. Pasolli, E. *et al.* Extensive Unexplored Human Microbiome Diversity Revealed by Over 150,000  
988 Genomes from Metagenomes Spanning Age, Geography, and Lifestyle. *Cell* **176**, 649–662.e20  
989 (2019).
- 990 71. Li, D. *et al.* MEGAHIT v1.0: A fast and scalable metagenome assembler driven by advanced  
991 methodologies and community practices. *Methods* **102**, 3–11 (2016).
- 992 72. Li, D., Liu, C. M., Luo, R., Sadakane, K. & Lam, T. W. MEGAHIT: an ultra-fast single-node  
993 solution for large and complex metagenomics assembly via succinct de Bruijn graph.  
994 *Bioinformatics* **31**, 1674–1676 (2015).

- 995 73. Steinegger M. & Söding J. Clustering huge protein sequence sets in linear time. *Nature*  
996 *Communications* **9**, 2542 (2018).
- 997 74. Nielsen, H. B. *et al.* Identification and assembly of genomes and genetic elements in complex  
998 metagenomic samples without using reference genomes. *Nature Biotechnology* **32**, 822–828  
999 (2014).
- 1000 75. O’Leary, N. A. *et al.* Reference sequence (RefSeq) database at NCBI: current status, taxonomic  
1001 expansion, and functional annotation. *Nucleic Acids Research* **44**, D733–D745 (2016).
- 1002 76. Huerta-Cepas, J. *et al.* eggNOG 5.0: a hierarchical, functionally and phylogenetically annotated  
1003 orthology resource based on 5090 organisms and 2502 viruses. *Nucleic Acids Research* **47**,  
1004 D309–D314 (2019).
- 1005 77. Cantalapiedra, C. P., Hernández-Plaza, A., Letunic, I., Bork, P. & Huerta-Cepas, J. eggNOG-  
1006 mapper v2: Functional Annotation, Orthology Assignments, and Domain Prediction at the  
1007 Metagenomic Scale. *Molecular Biology and Evolution* **38**, 5825–5829 (2021).
- 1008 78. Evans, A. M., DeHaven, C. D., Barrett, T., Mitchell, M. & Milgram, E. Integrated, nontargeted  
1009 ultrahigh performance liquid chromatography/ electrospray ionization tandem mass  
1010 spectrometry platform for the identification and relative quantification of the small-molecule  
1011 complement of biological systems. *Analytical Chemistry* **81**, 6656–6667 (2009).
- 1012 79. Oksanen, J. *et al.* vegan: Community Ecology Package. R package version 2.5-7.  
1013 <https://CRAN.R-project.org/package=vegan>. (2020).
- 1014 80. Korotkevich, G. *et al.* Fast gene set enrichment analysis. *bioRxiv* (2021).
- 1015 81. Kim, S. ppcor: An R Package for a Fast Calculation to Semi-partial Correlation Coefficients.  
1016 *Communications for Statistical Applications and Methods* **22**, 665–674 (2015).
- 1017
- 1018

1019 **Table 1** Descriptive characteristics of participants in the discovery cohort (SCAPIS study)

|                                                  | <b>Malmö</b>      | <b>Uppsala</b>    |
|--------------------------------------------------|-------------------|-------------------|
|                                                  | <b>n=4,541</b>    | <b>n=4,432</b>    |
| CACS <sup>†‡</sup>                               | 0.00 [0.00; 27.0] | 0.00 [0.00; 15.0] |
| Clinical CACS, n (%) <sup>‡</sup> :              |                   |                   |
| 0                                                | 2,574 (56.7)      | 2,781 (62.7)      |
| 1–100                                            | 1,379 (30.4)      | 1,187 (26.8)      |
| 101–400                                          | 398 (8.76)        | 319 (7.20)        |
| >400                                             | 190 (4.18)        | 145 (3.27)        |
| Carotid arteries with identified plaques, n (%): |                   |                   |
| None                                             | 1,862 (41.1)      | 1,959 (44.2)      |
| Unilateral                                       | 1,388 (30.7)      | 1,391 (31.4)      |
| Bilateral                                        | 1,275 (28.2)      | 1,080 (24.4)      |
| Age (years)*                                     | 57.3 (4.28)       | 57.6 (4.39)       |
| Sex, female, n (%)                               | 2,480 (54.6)      | 2,336 (52.7)      |
| Country of birth, n (%):                         |                   |                   |
| Scandinavia                                      | 3,575 (78.7)      | 4,001 (90.3)      |
| Asia                                             | 237 (5.22)        | 170 (3.84)        |
| Rest of Europe                                   | 629 (13.9)        | 165 (3.72)        |
| Other                                            | 100 (2.20)        | 96 (2.17)         |
| Triglycerides, mmol/L <sup>†</sup>               | 1.10 [0.80; 1.50] | 1.09 [0.83; 1.53] |
| LDL cholesterol, mg/L* <sup>‡</sup>              | 3.64 (0.94)       | 3.57 (0.92)       |
| HDL cholesterol, mmol/L <sup>†‡</sup>            | 1.60 [1.30; 2.00] | 1.40 [1.20; 1.70] |
| Total cholesterol*                               | 5.48 (1.00)       | 5.73 (1.05)       |
| SBP, mmHG* <sup>‡</sup>                          | 122 (16.4)        | 125 (15.9)        |
| DBP, mmHG* <sup>‡</sup>                          | 75 (9.65)         | 77 (9.79)         |

|                                                   |                      |                      |
|---------------------------------------------------|----------------------|----------------------|
| BMI, kg/m <sup>2</sup> ‡                          | 27.2 (4.58)          | 27.0 (4.36)          |
| HsCRP, mmol/L <sup>†‡</sup>                       | 1.20 [0.60; 2.40]    | 1.20 [0.59; 2.30]    |
| Neutrophil counts*10 <sup>9</sup> /L <sup>†</sup> | 3.00 [2.40; 3.80]    | 2.80 [2.30; 3.50]    |
| Leukocyte counts*10 <sup>9</sup> /L <sup>†</sup>  | 5.60 [4.70; 6.70]    | 5.30 [4.60; 6.30]    |
| Total energy intake, Kcal/day <sup>†</sup>        | 1,578 [1,220; 2,066] | 1,612 [1,268; 2,048] |
| Fiber intake, g/day <sup>†</sup>                  | 11.3 [8.58; 14.2]    | 11.5 [9.01; 14.1]    |
| Diabetes, n (%)                                   | 198 (4.55)           | 171 (4.07)           |
| Crohn's and ulcerative disease, n (%):            | 43 (1.00)            | 52 (1.24)            |
| Medication for dyslipidemia, n (%)                | 292 (6.71)           | 274 (6.53)           |
| Medication for high blood pressure, n (%)         | 834 (19.2)           | 764 (18.2)           |
| Medication for diabetes, n (%)                    | 165 (3.80)           | 140 (3.34)           |
| Proton pump inhibitor, n (%)                      | 159 (4.51)           | 122 (2.78)           |
| Antibiotic treatment (J01 class), n (%)           | 931 (20.5)           | 819 (18.5)           |
| Smoking, n (%):                                   |                      |                      |
| Never smoker                                      | 1,948 (44.0)         | 2,469 (58.6)         |
| Former smoker                                     | 1,681 (38.0)         | 1,351 (32.1)         |
| Current smoker                                    | 795 (18.0)           | 394 (9.35)           |
| Physical activity in leisure time, n (%):         |                      |                      |
| Sedentary                                         | 594 (13.8)           | 425 (10.2)           |
| Moderate exercise                                 | 2,107 (48.9)         | 1,873 (45.1)         |
| Moderate but regular exercise                     | 1,114 (25.8)         | 1,357 (32.7)         |
| Regular exercise and training                     | 498 (11.5)           | 496 (11.9)           |

1020

1021 \* Mean (standard deviation).

1022 † Median [interquartile range].

1023 ‡ CACS, coronary artery calcium score; LDL, low-density lipoprotein; HDL, high-density lipoprotein;

1024 SBP, systolic blood pressure; DBP, diastolic blood pressure; BMI, body mass index; hsCRP, high-  
1025 sensitivity C-reactive protein.



1026 **Fig. 1 Beta diversity across the coronary artery calcium score (CACS) categories.** Representation  
1027 of the two principal coordinates (PCo) based on Bray-Curtis dissimilarity between individuals colored  
1028 according to clinical categories of CACS, a measure of asymptomatic atherosclerosis. The centroid of  
1029 the two first coordinates is shown as a triangle. Absent: CACS=0; Mild:  $1 \leq \text{CACS} < 101$ ; Moderate:  
1030  $101 \leq \text{CACS} < 401$ ; and Extensive: CACS>400.  
1031

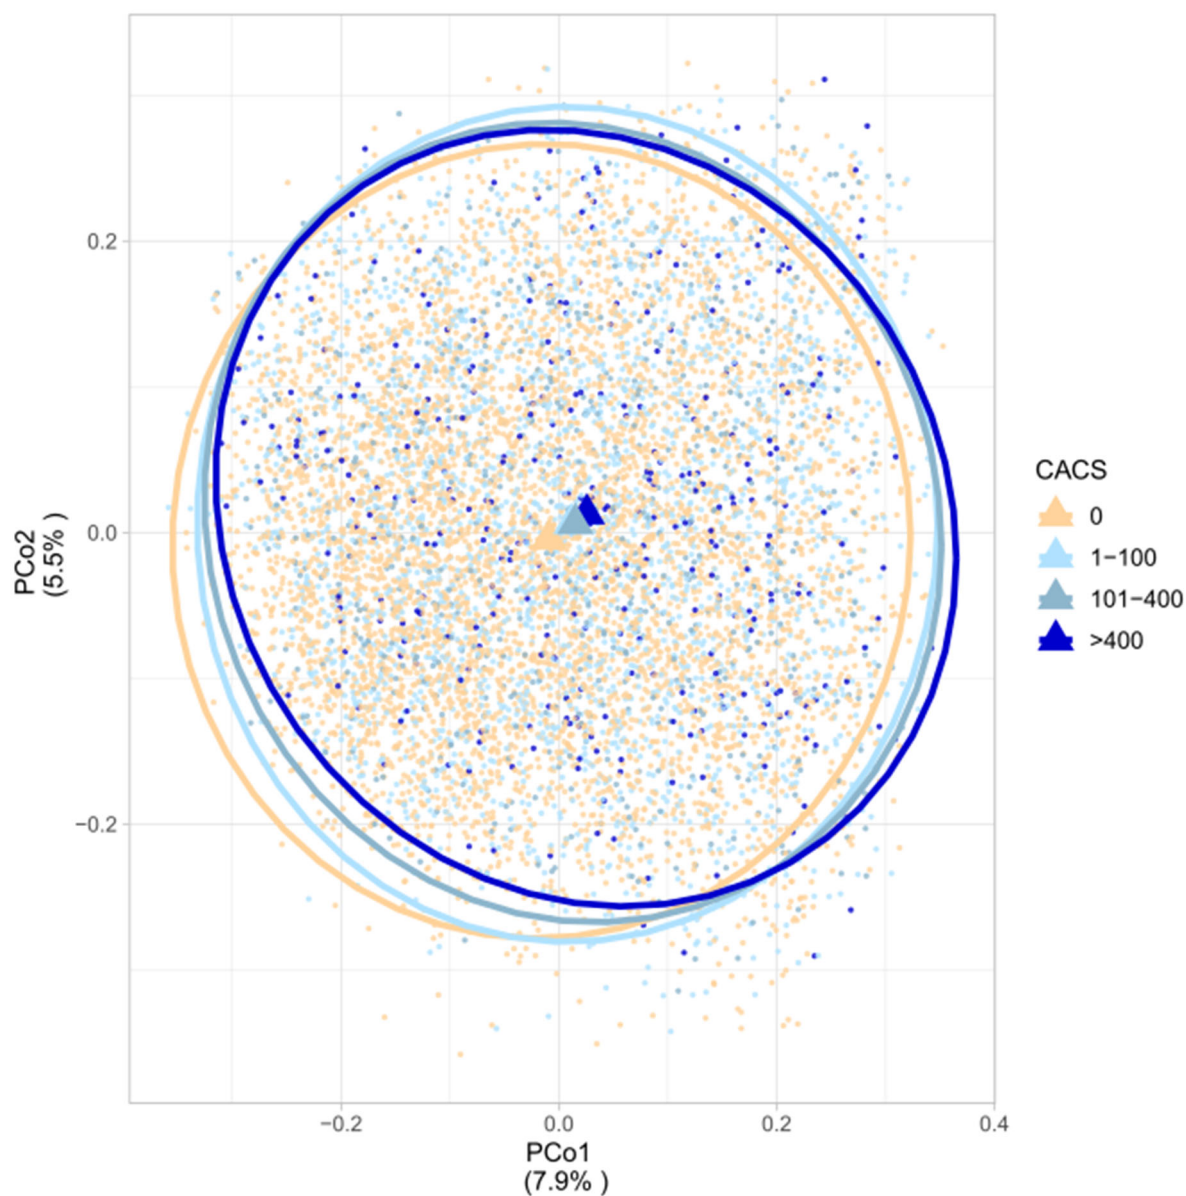

1032

**Fig. 2 Metagenomic species associated with coronary artery calcium score (CACS) in the basic model and the full model showed an overrepresentation of *Streptococcus* spp.** **a**, Cladogram of species associated with CACS with a p-value <0.05 (unadjusted for multiple testing) in the basic model. Blue shade indicates the genera overrepresented (FDR<5%) in the enrichment analysis using gene-set enrichment analysis. Only the metagenomics species identified at least to species level were highlighted. Red circles indicate the streptococcal species associated with CACS in the full model (FDR<5%). Turquoise circles indicate the non-streptococcal species associated with CACS in the full model (FDR<5%). **b**, Volcano plot representing all the associations between species and CACS in basic model. Red dots indicate the significant streptococcal species associated with CACS (FDR<5%), turquoise dots indicate significant non-streptococcal species associated with CACS (FDR<5%), and grey dots indicate the associations between non-significant species and CACS (FDR≥5%). **c**, Dot plot showing the results of the enrichment analysis using gene-set enrichment analysis at genus level using the ranked p-values with positive regression coefficients of the associations between species and CACS in the basic model. Modules with less than 15 elements were removed from the plot to improve the visualization. *Streptococcus* was the only enriched genus (FDR<5%) and it is indicated with a blue dot. **d**, Forest plot of the *Streptococcus* spp. associated with CACS in the basic mode and full model with FDR<5%. The dots represent the estimate of the association between the *Streptococcus* spp. and the CACS, and the bar represents the 95% confidence intervals. The estimates and the confidence intervals were  $\ln(x+10)$  -1 transformed to improve the figure visualization. Orange color represents sex-combined analysis, purple color represents results for the female population, and blue color represents results for the male population. The \* indicates the existence of a sex-effect modification in the association between the *Streptococcus* spp. and the CACS (unadjusted for multiple testing).

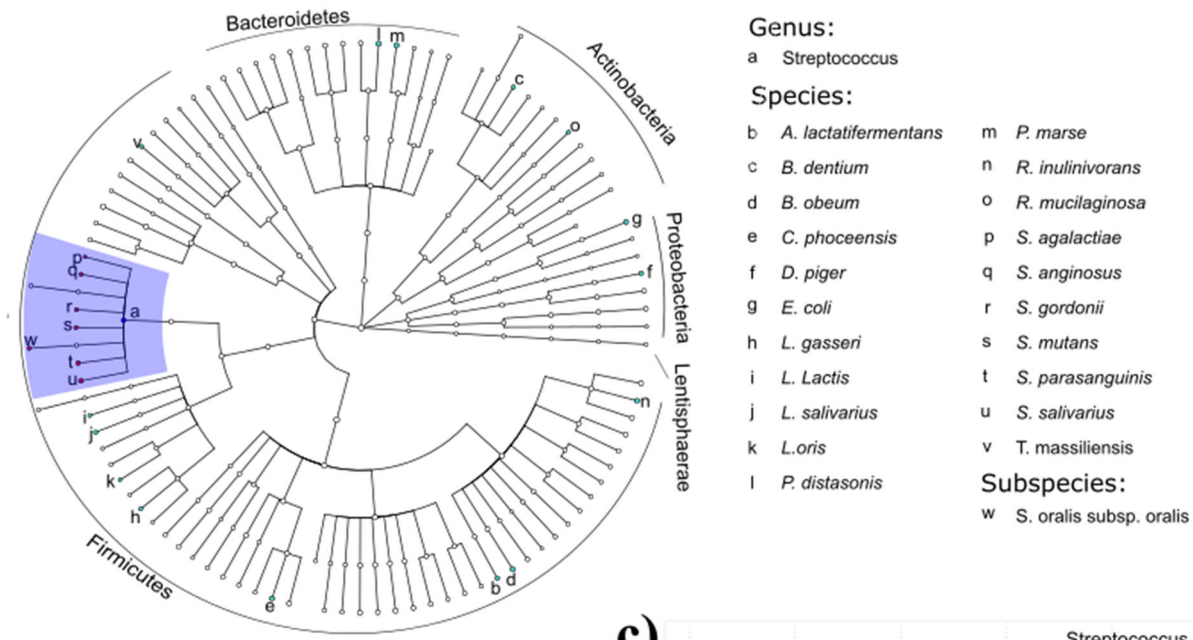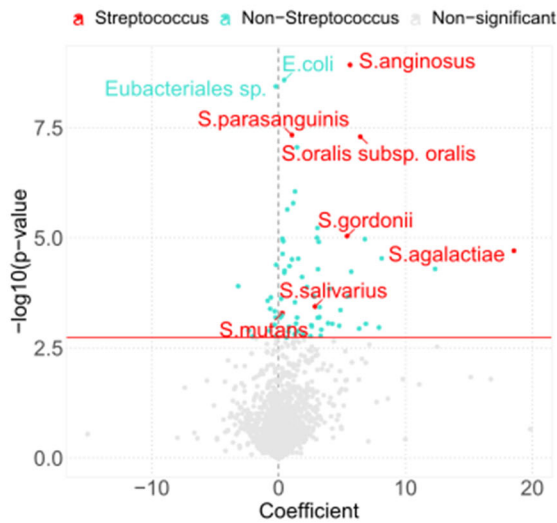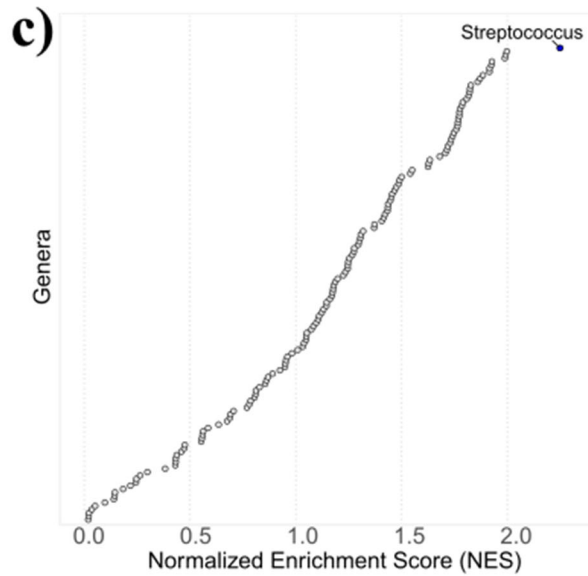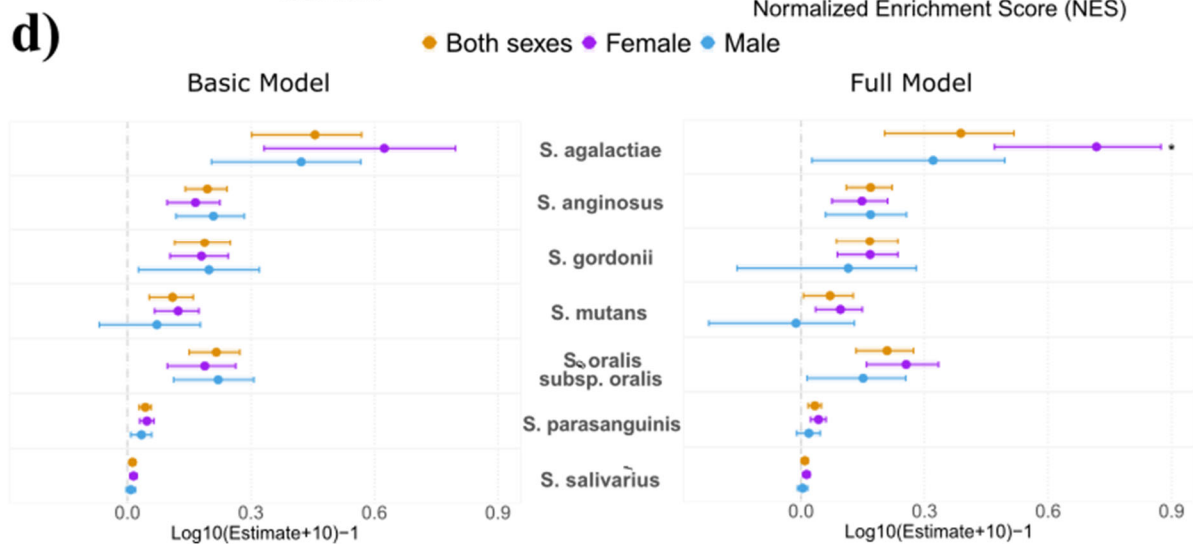

**Fig. 3 Heatmaps of associations between CACS-related gut *Streptococcus* spp. and plasma metabolites sub-pathways, inflammatory and infection markers, and oral *Streptococcus* spp. related to oral health phenotypes.**

**a,** Heatmap showing the enrichment of metabolite sub-pathways based in full adjusted associations between CACS-related gut *Streptococcus* spp. and plasma metabolites. Blue represents the normalized enrichment score (NES) on the enrichment analysis for the negative associations between the *Streptococcus* spp. and plasma metabolites and red represents the NES on the enrichment analysis based on the positive associations. Significant enrichments at 5% FDR are displayed with an asterisk (\*). **b,** Heatmap showing linear associations between CACS-related gut *Streptococcus* spp. and three inflammatory markers (hsCRP: high-sensitivity C-reactive protein, neutrophils and leukocytes) adjusted for age, sex, country of birth, center site, metagenomics extraction plate within the center site, Shannon diversity index, smoking, physical activity, fiber and total energy intake, and self-reported medication for dyslipidemia, hypertension and/or diabetes. The three inflammatory markers were scaled to mean of 0 and standard deviation of 1. The heatmap is colored based on the magnitude of the linear correlation coefficient. Significant associations at 5% FDR are displayed with an asterisk (\*). **c)** Heatmap showing the associations between oral CACS-related gut *Streptococcus* spp. and three oral health phenotypes (Filled surface, Caries and Gingival inflammation) adjusted for age, sex, smoking, education, oral hygiene, activity realized the hour before attending to the dental examination, and Shannon diversity index. The heatmap is colored based on the natural logarithm of the odds ratio ( $\ln(\text{odds ratio})$ ). Significant associations at 5% FDR are displayed with an asterisk (\*).

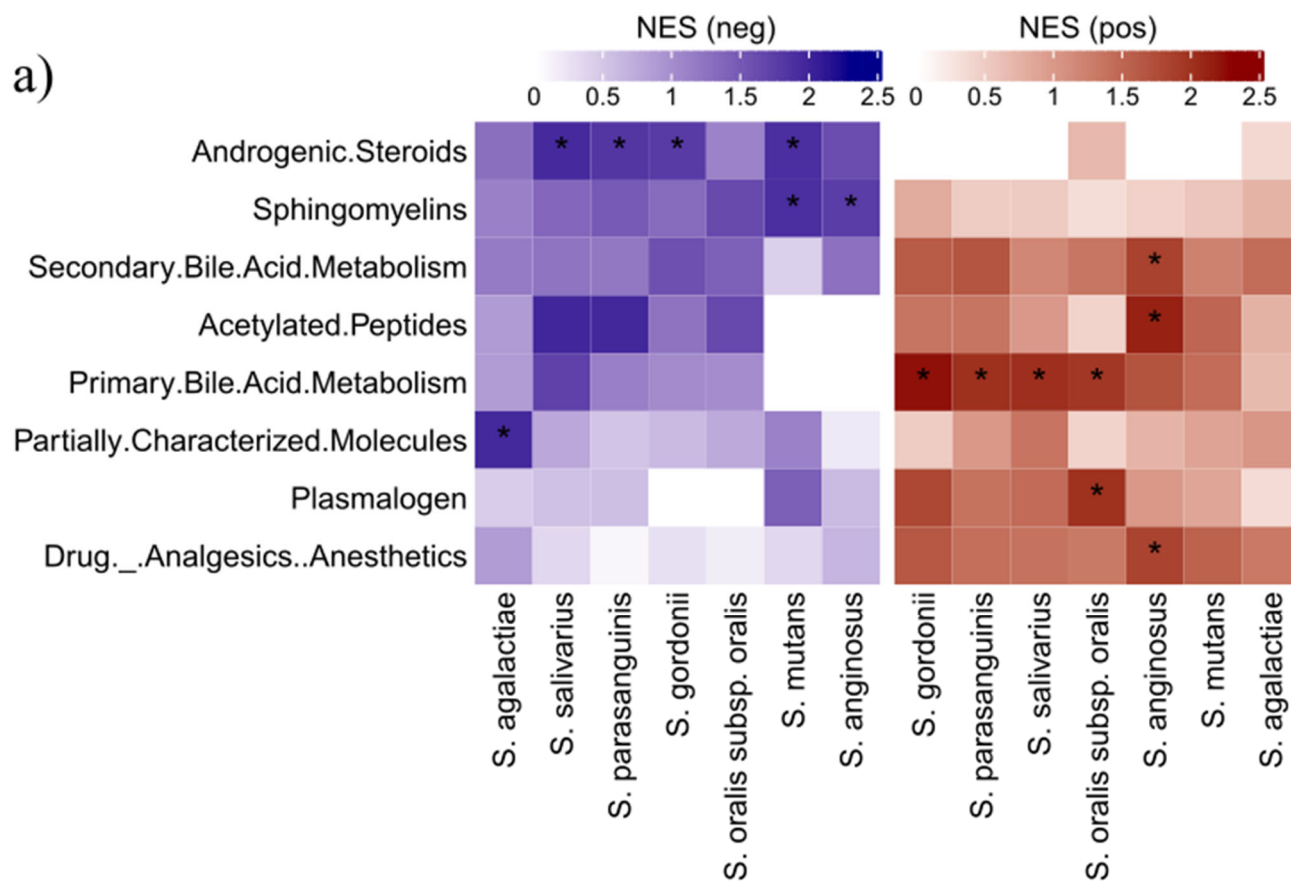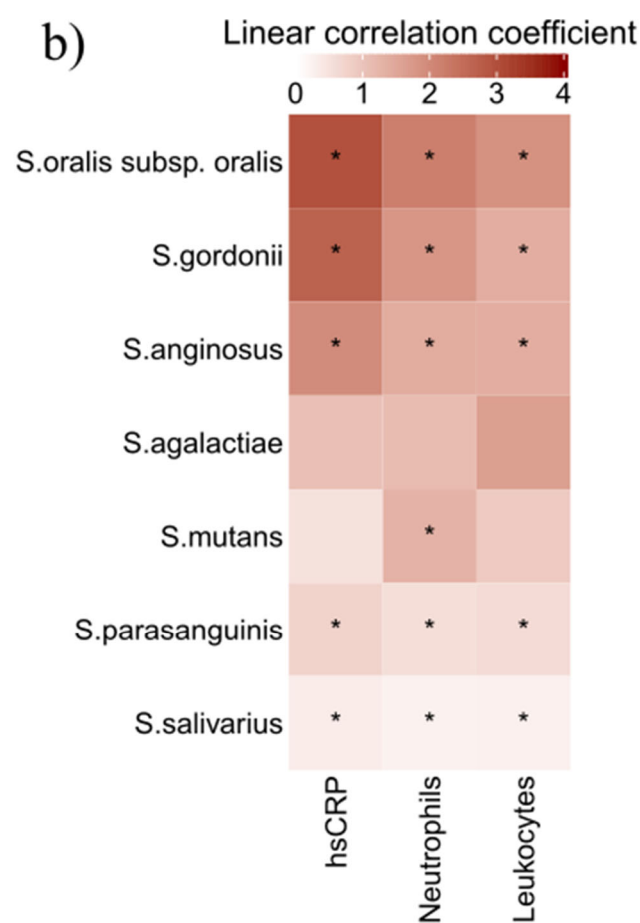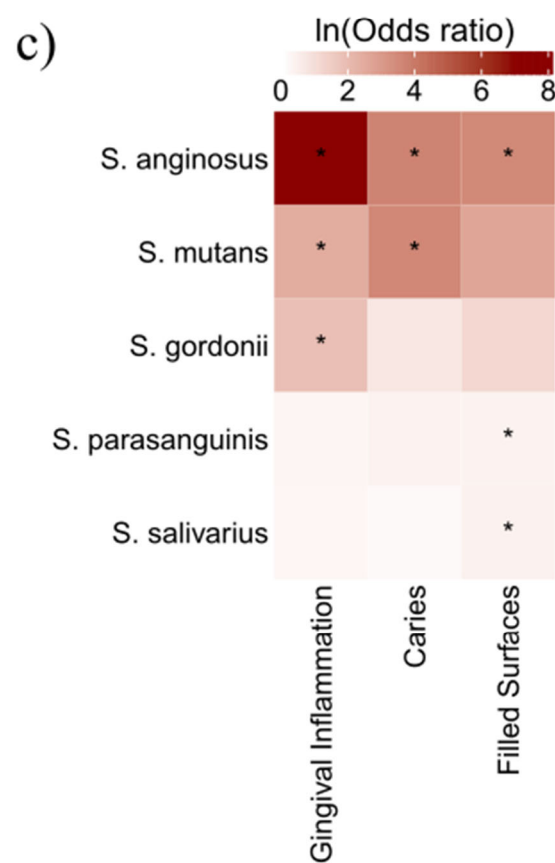



**Extended Data Fig. 1 Directed acyclic graph of the assumed framework in the associations between the gut microbiome and atherosclerosis.** The graph was generated in DAGitty v3.0 assuming gut microbiota species are causally associated with atherosclerosis. A directed edge (or “arrow”) from one node to another represents a direct effect between these two nodes. Red circles represent confounder variables, blue circles mediator variables, green circles technical source of variation, and grey circles unobserved variables. BP, blood pressure; Dyslipidemia Med, medication for dyslipidemia; Diabetes Med, medication for diabetes; BP med, medication for blood pressure; BMI, body mass index; PA, physical activity.

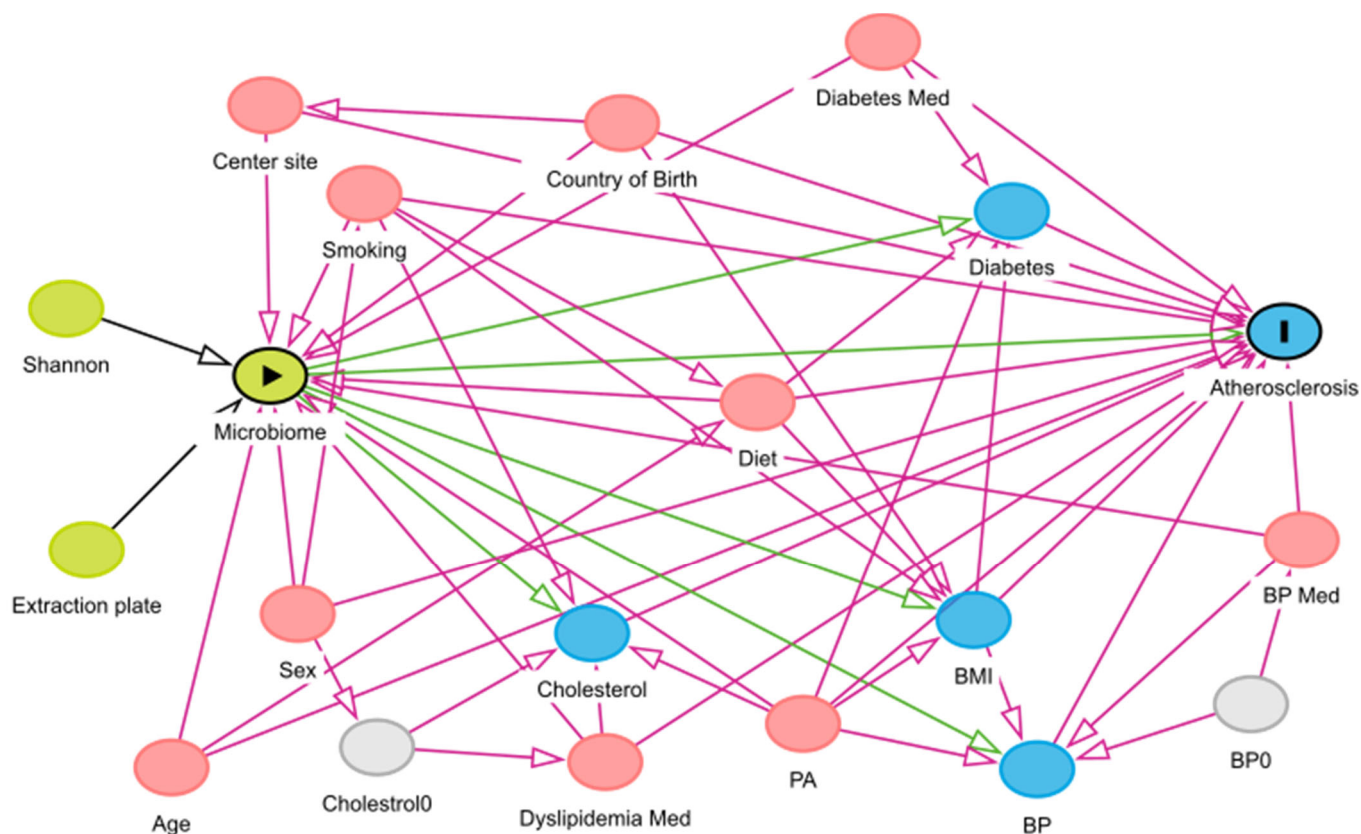

**Extended Data Fig. 2 Quantile-quantile plot (qq-plot) of p-values from simulation studies performed prior to the analysis of the relationship between species and coronary artery calcium score (CACs).** The first data delivered from Clinical Microbiomics A/S (n=438) was shuffled randomly to create a simulation dataset with maintained variable distribution. The y axis has been truncated at 10 units to improve the visualization of the qq-plots. Then, 12 models were tested to compare their performance in the dataset and are depicted in the qq-plot. Boot.lm, linear model with bootstrapping standard errors; boot.lm.resi, linear model with bootstrapping based on the residuals; boot.nb; negative binomial model with bootstrapping standard errors; hurdle.nb.count, the count part of the hurdle negative binomial model; hurdle.nb.zero, the zero part of the hurdle negative binomial model; lm.clr, linear model transforming the species data using center log ratio transformation; lm.log1p, linear model transforming the species data using natural logarithm of the relative abundance plus one; nb, negative binomial model; nb.clr, negative binomial transforming the species data using center log ratio transformation; ordinal, ordinal regression model, robust.lm, linear model using robust standard errors; spearman, partial spearman correlation; two.stage.count, linear model on the counts different to zero after a first step using natural logistic regression; and two.stage.zero, logistic regression applied before a second step using linear regression on the counts different to zero.



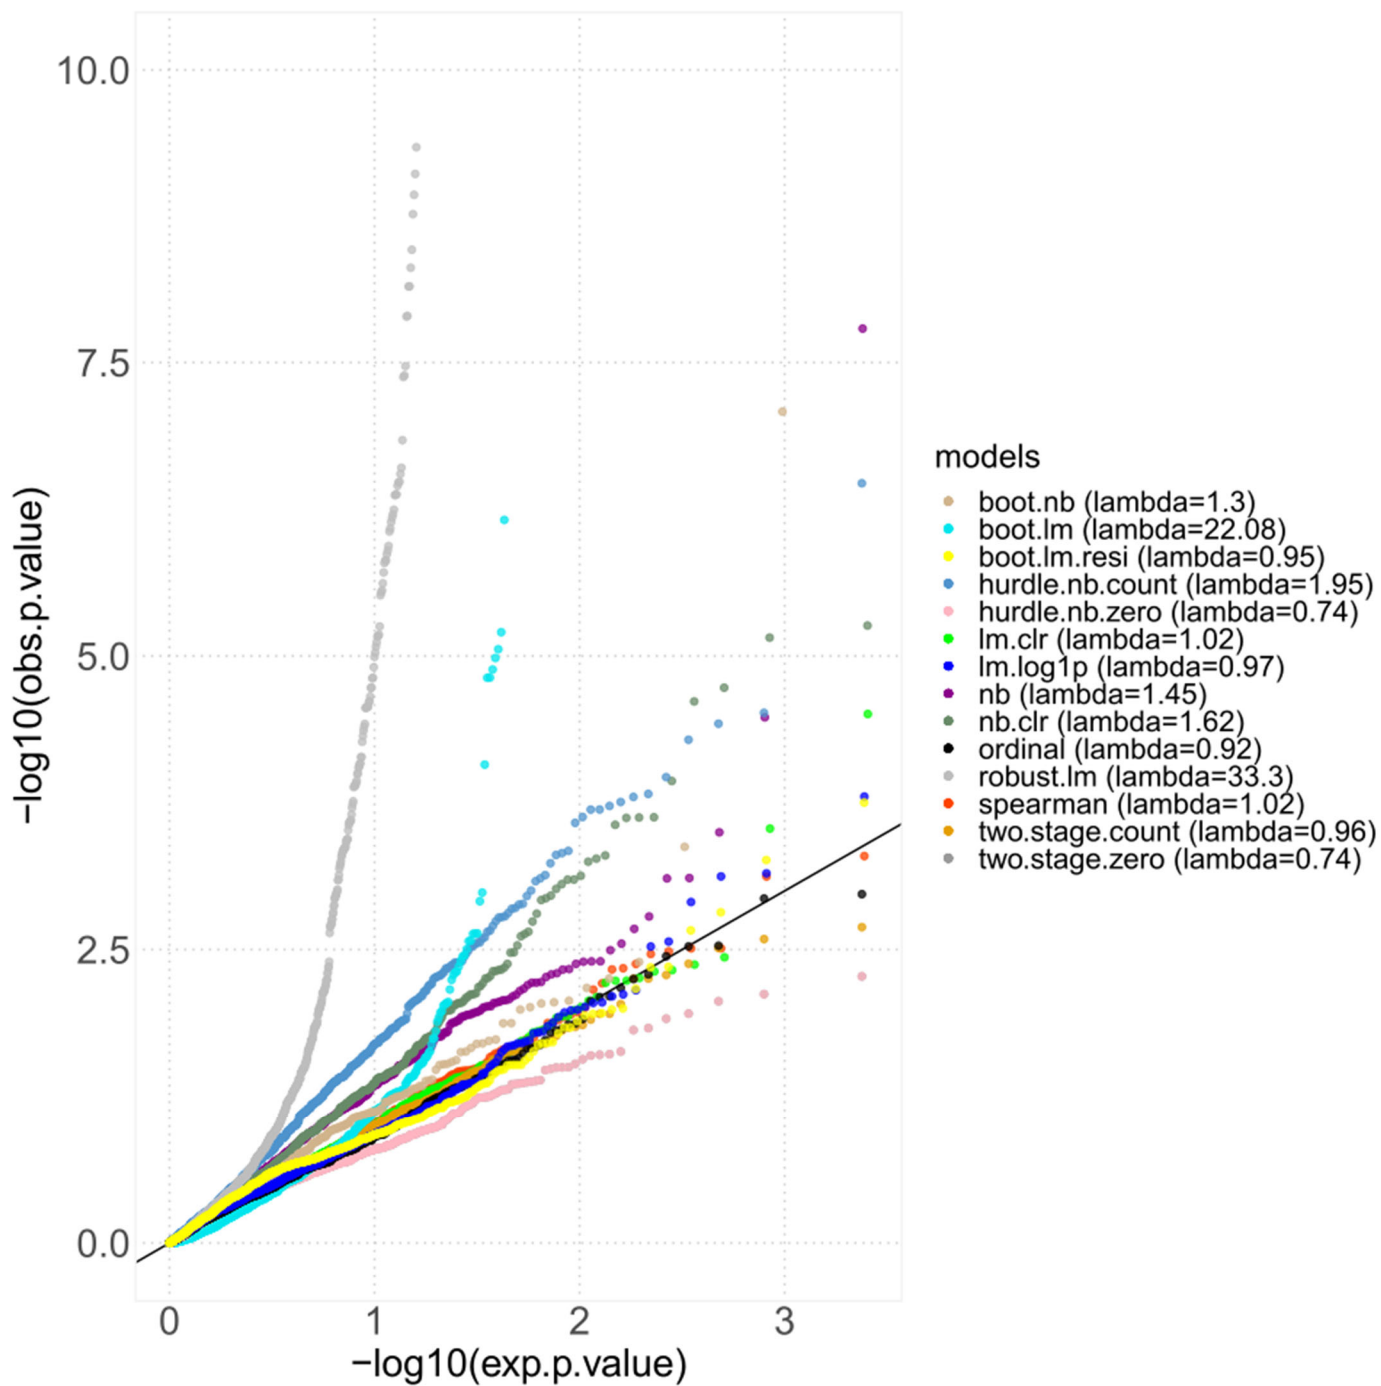

**Extended Data Fig. 3** Scatterplot showing the correlation between the estimates and the p-values of the basic model and the full model in 8,155 participants with complete data on all covariates. Blue line indicates the linear regression showing a slightly lower slope compared to the black line, which represents the regression with slope =1. The Pearson correlation (R) between the main model and the sensitivity model is displayed in the figure.

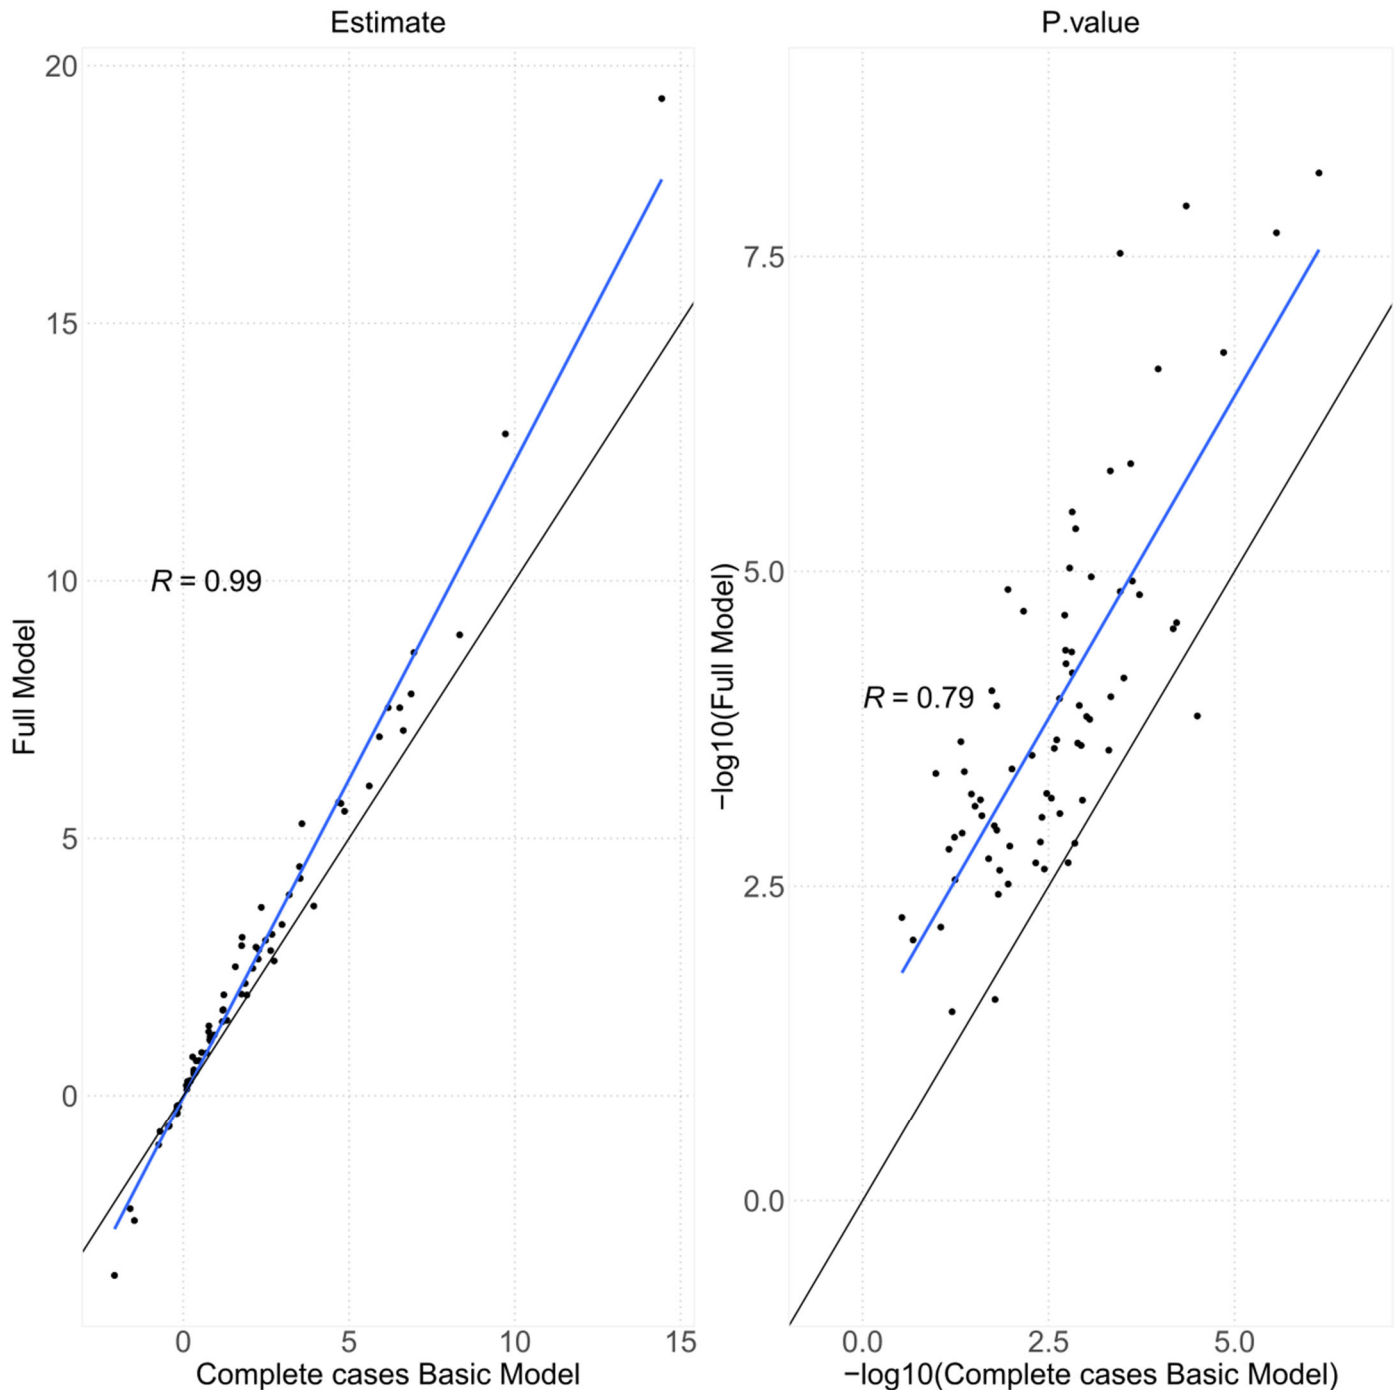

**Extended Data Fig. 4** Scatterplot showing the correlation between the main analysis using basic and full models and sensitivity models excluding participants with Crohn's disease, antibiotic drug users, without adjusting for Shannon diversity index, and after adjusting the full model for body mass index (BMI), participants receiving proton-pump inhibitors (PPI) and/or established cardiovascular risk factors (CVRF). Blue lines indicate the linear regression and the black lines represent the regression with slope =1. The Pearson correlation (R) between the main model and the sensitivity model is displayed in the figure.

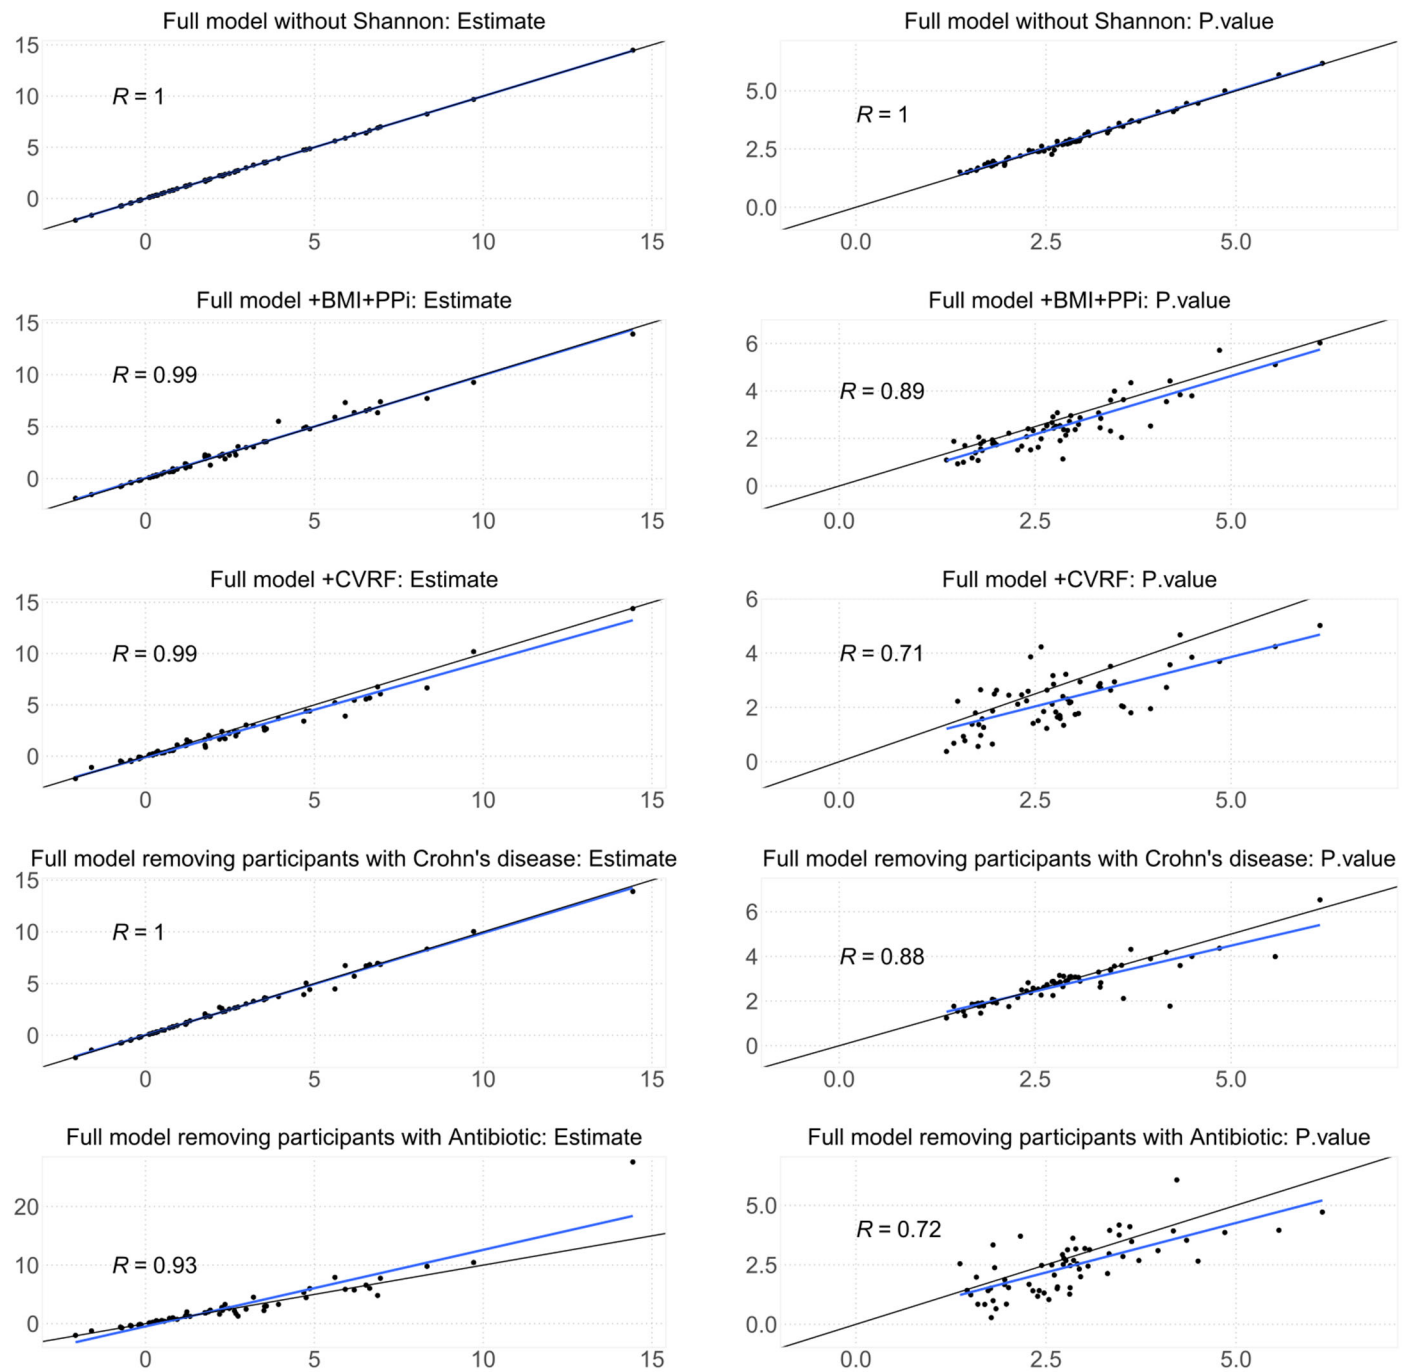

**Extended Data Fig. 5 Forest plot of the species associated with CACS showing sex-effect modification with p-value <0.05 (unadjusted for multiple testing) in the full model.** The dot represents the estimate of the association between the species and the CACS, and the bar represents the 95% confidence interval. Orange color represents sex-combined analysis, purple color represents results for the female population, and blue color represents results for the male population.

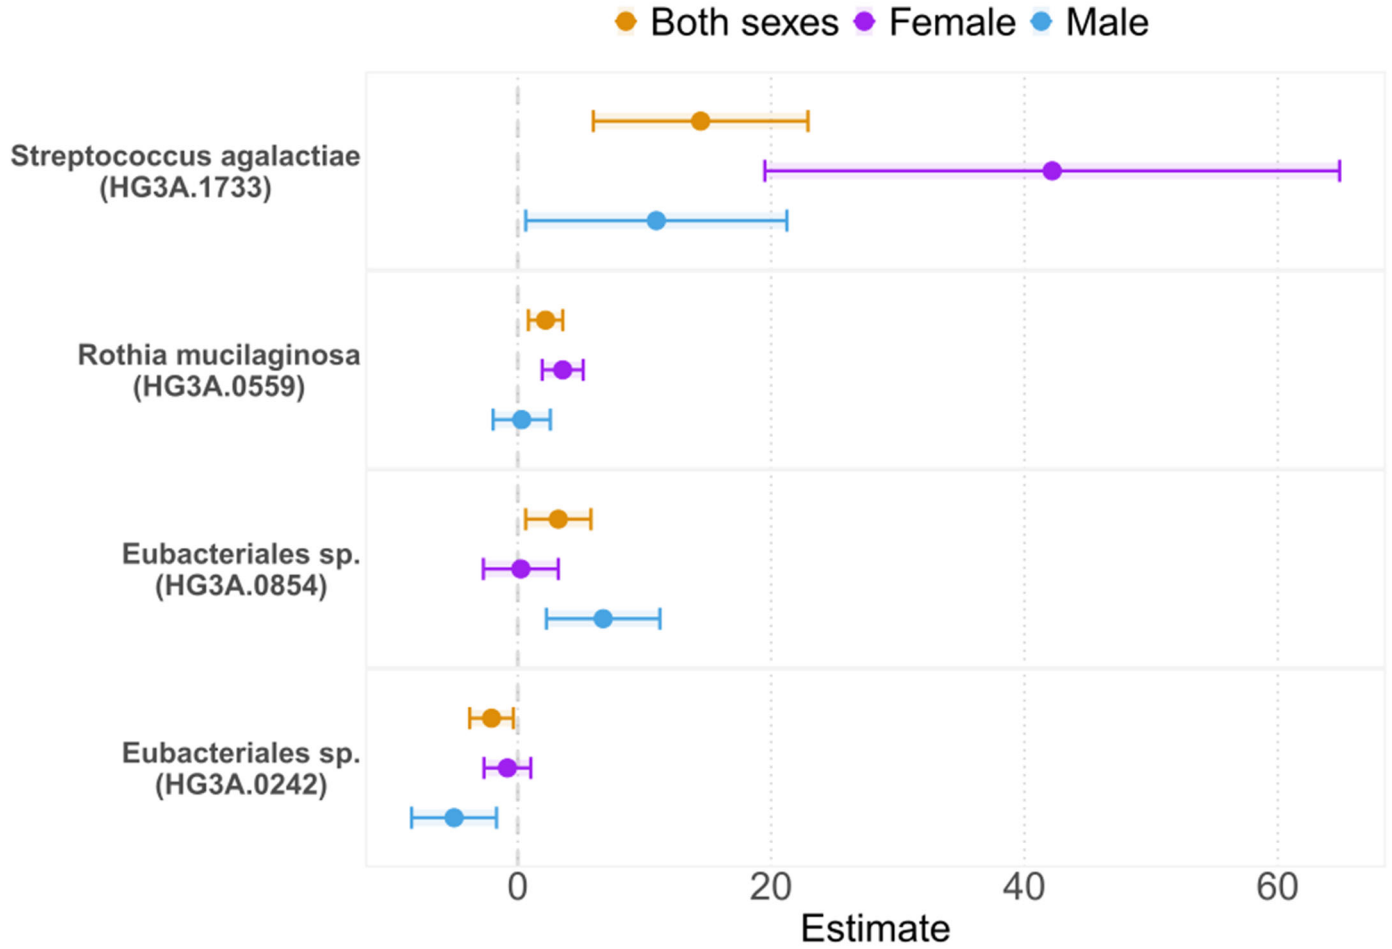

**Extended data Fig. 6 The distribution of fifteen species associated with increased coronary artery calcium score in the SCAPIS study over 210 cases and 163 controls of symptomatic atherosclerotic cardiovascular disease in the case-control study by Jie Z et al. The species were identified using the same gene signature as in SCAPIS and the resulting relative abundance were rank-based inverse normal transformed.**

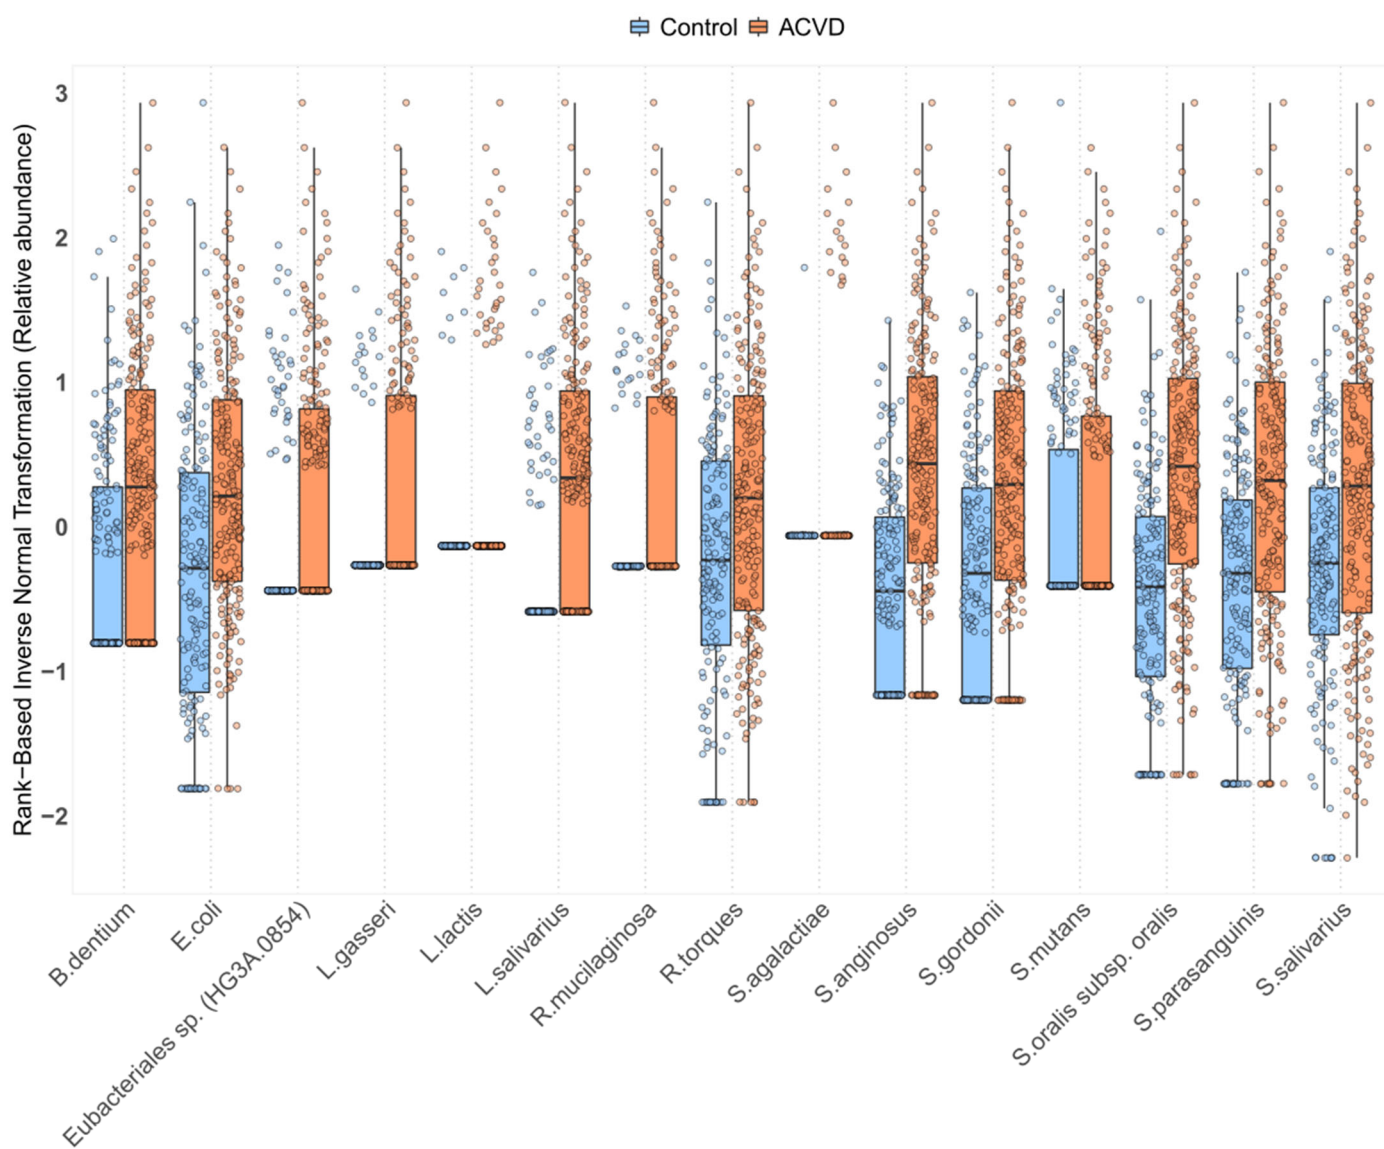

**Extended data Fig. 7 Functional gut metabolic modules (GMM) enriched on the positive associations between species and CACS in the basic model.** **a**, Dot plot showing the results of the enrichment analysis using gene-set enrichment analysis (GSEA) to identify functional GMM using the ranked p-values of the positive associations between species and CACS in the basic model. Blue dots indicate the enriched GMM. **b**, Dot plot showing the results of the enrichment analysis using gene-set enrichment analysis (GSEA) to identify functional GMM using the ranked p-values of the negative associations between species and CACS in the basic model. Orange dots indicate the enriched GMM. **c**, GSEA applying leave-one (taxon)-out analysis removing one genus at a time for each enriched GMM. Red dots indicate the analysis removing *Streptococcus* genus and the black lines indicate the enrichment analysis without removing any genus. The genera indicated in the figure are the two removed genus that causes lower normalized enrichment score (NES) or the two removed genus that causes higher normalized enrichment score (NES).



a)

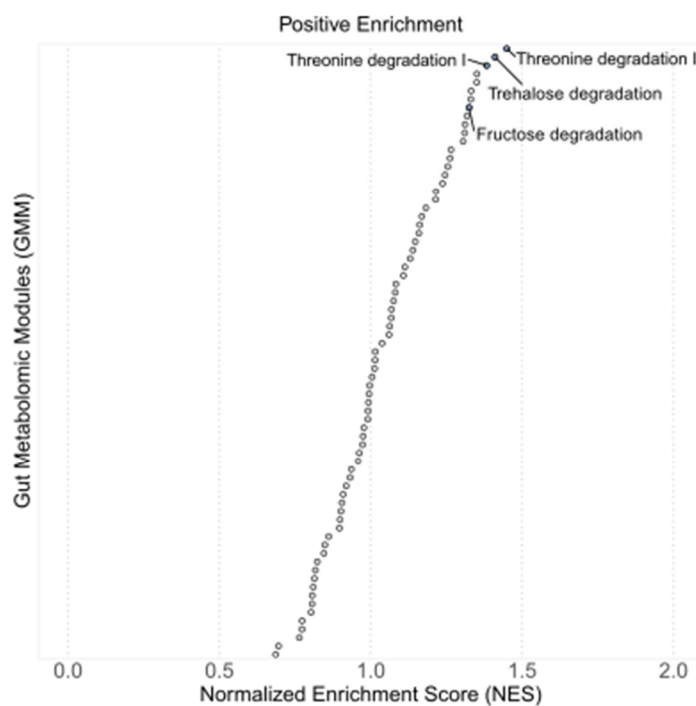

b)

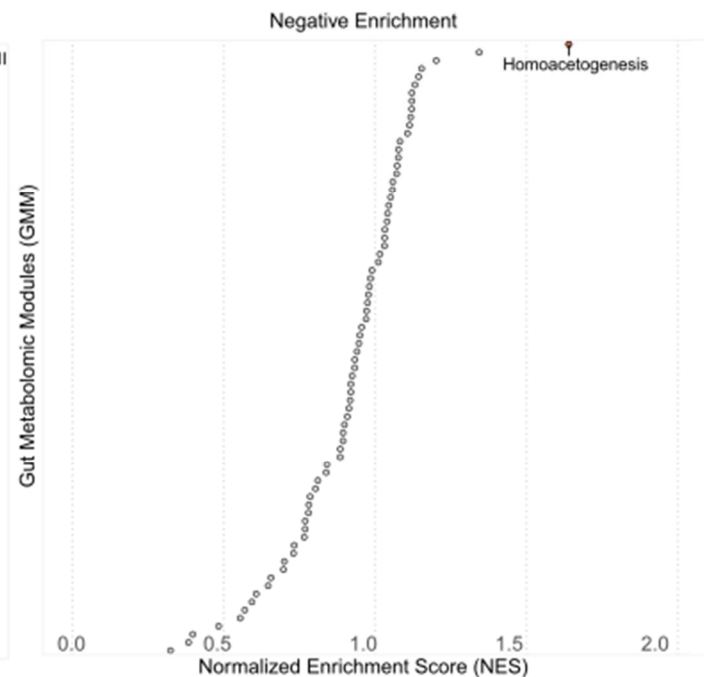

c)

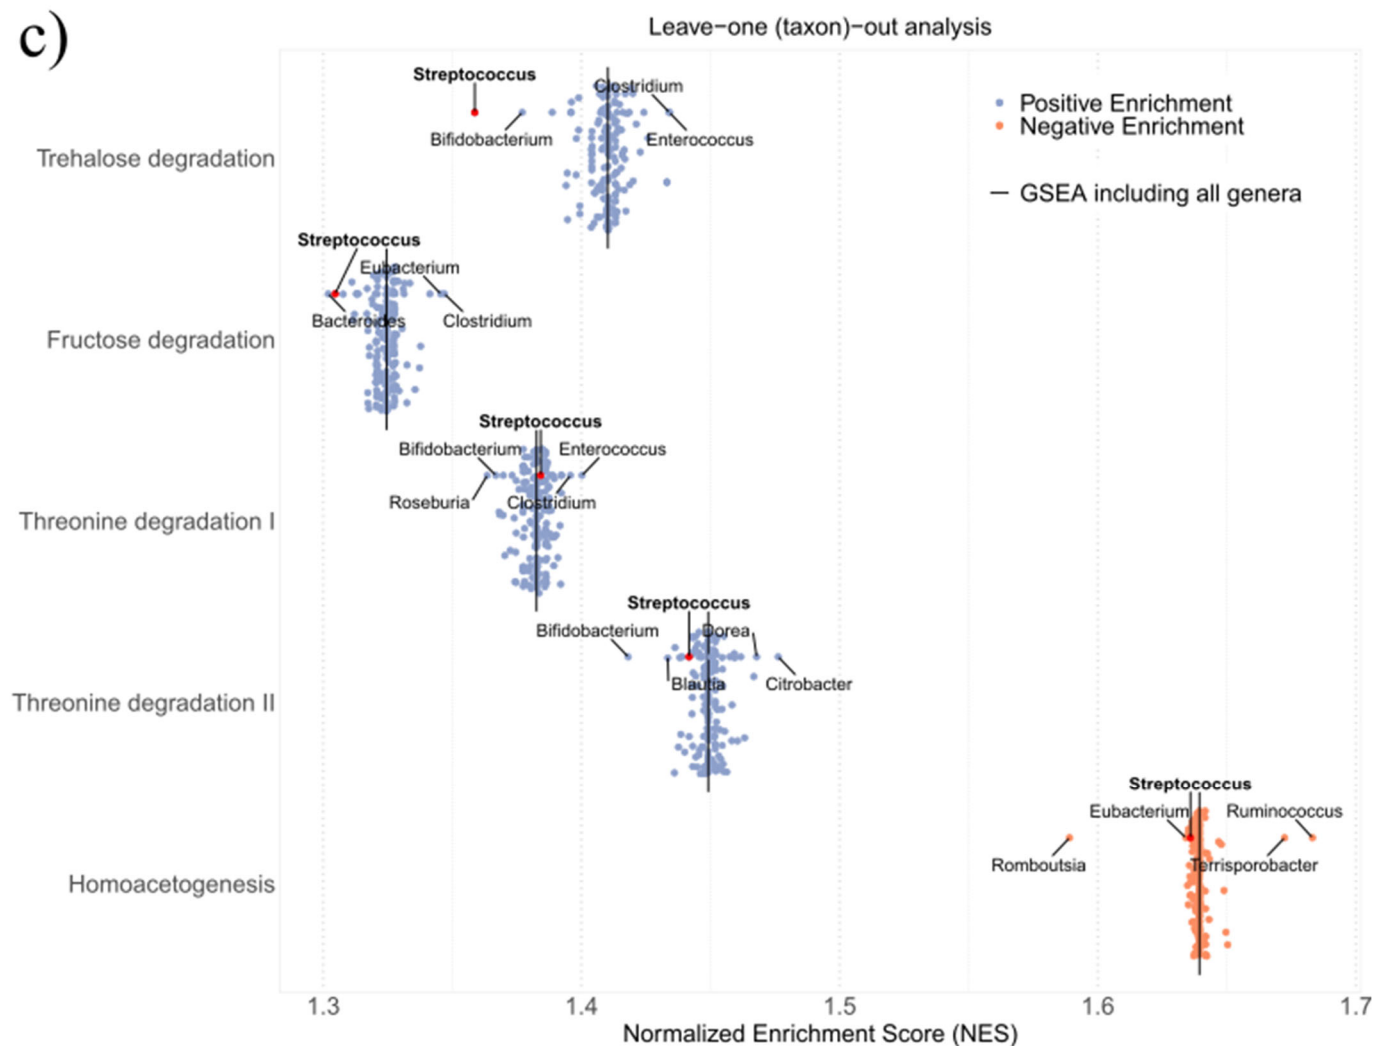



**Extended data Fig. 8 Correlations between CACS-associated species and plasma metabolites of enriched**

**metabolic sub-pathways. a,** Heatmap showing the partial Spearman correlations between CACS-associated

*Streptococcus* spp. and plasma metabolites involved in the significantly enriched metabolic sub-pathway based on the ranked p-values of positive associations adjusted for the covariates used in the full model (model adjusted for age, sex, country of birth, smoking, physical activity, total energy intake, fiber intake, self-reported medication prescribed for dyslipidemia, high blood pressure, and/or diabetes, and technical variables including center site, metagenomics extraction plate and Shannon diversity index). The asterisk (\*) indicates the associations significant at 5% FDR. **b,**

Heatmap showing the partial Spearman correlations between CACS-associated *Streptococcus* spp. and plasma metabolites involved in the significantly enriched metabolic sub-pathway based on the ranked p-values of negative associations adjusted for the covariates used in the full model. The asterisk (\*) indicates the associations significant at 5% FDR.



**Extended data Fig. 9 Scatterplot showing the correlation between the estimates and the p-values of the associations between *Streptococcus* spp. and CACS in the full model (n=5,683) with and without adjustment for metabolites with <30% missing data involved in sub-pathways related to primary and secondary bile acids metabolism, acetylated peptides, plasmalogen, androgenic steroids, sphingomyelins, analgesic and anesthetic drugs, and/or partially characterized molecules; and the same analysis but restricting the analysis to those participants with complete data.** Blue lines indicate the linear regression and the black lines represent the regression with slope =1. The Pearson correlation (R) between the main model and the sensitivity model is displayed in the figure.

Complete Data: Estimate

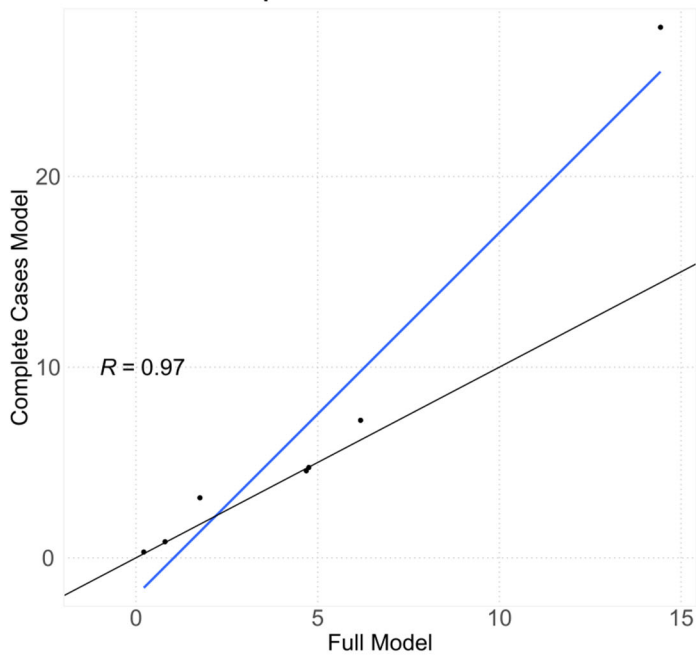

Complete Data: P.value

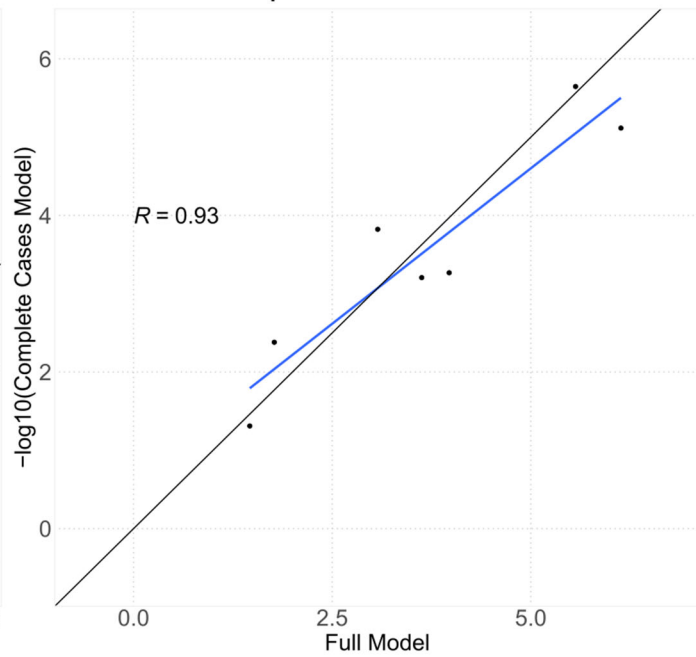

Full+Metabolites: Estimate

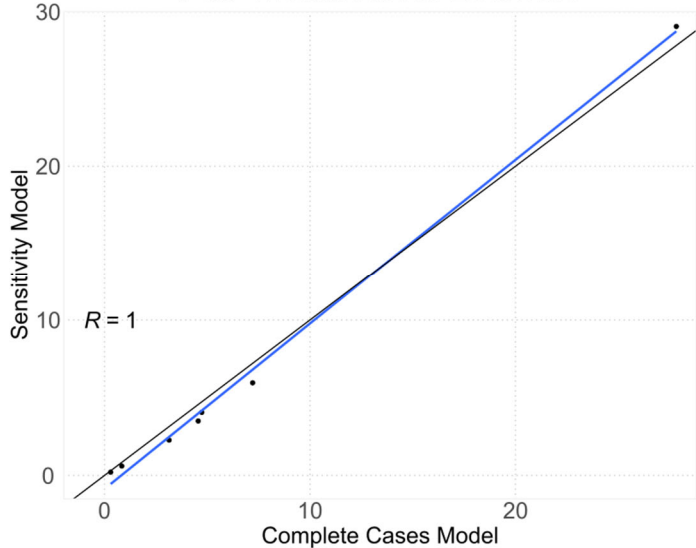

Full+Metabolites: P.value

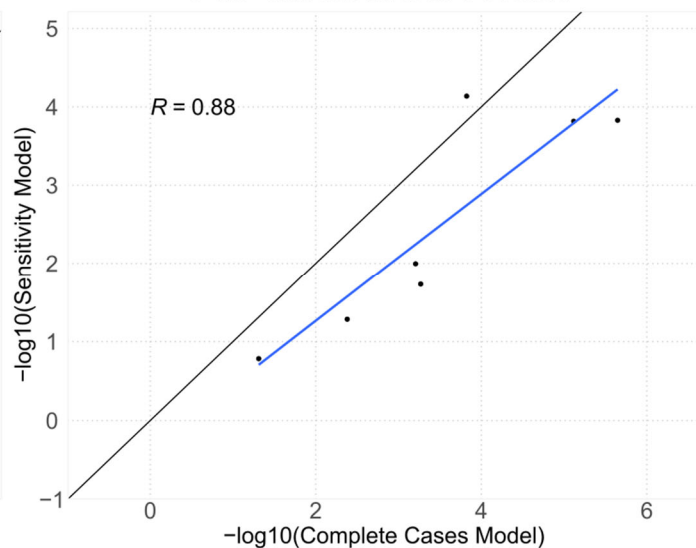

**Extended data Fig. 10 Directed acyclic graph of the hypothetical causal framework in the association between the oral *Streptococcus* spp. and three phenotypes of oral health (filled surface, caries and gingival inflammation).** The graph was generated in DAGitty v3.0 assuming causal association between *Streptococcus* spp. and oral health. A directed edge (or “arrow”) from one node to another represents a direct effect between these two nodes. Red circles represent confounder variables, blue circles mediator variables, and green circles technical source of variation. Dyslipidemia Med, medication for dyslipidemia; and Last Hour Act, activity realized the hour before attending to the dental examination.

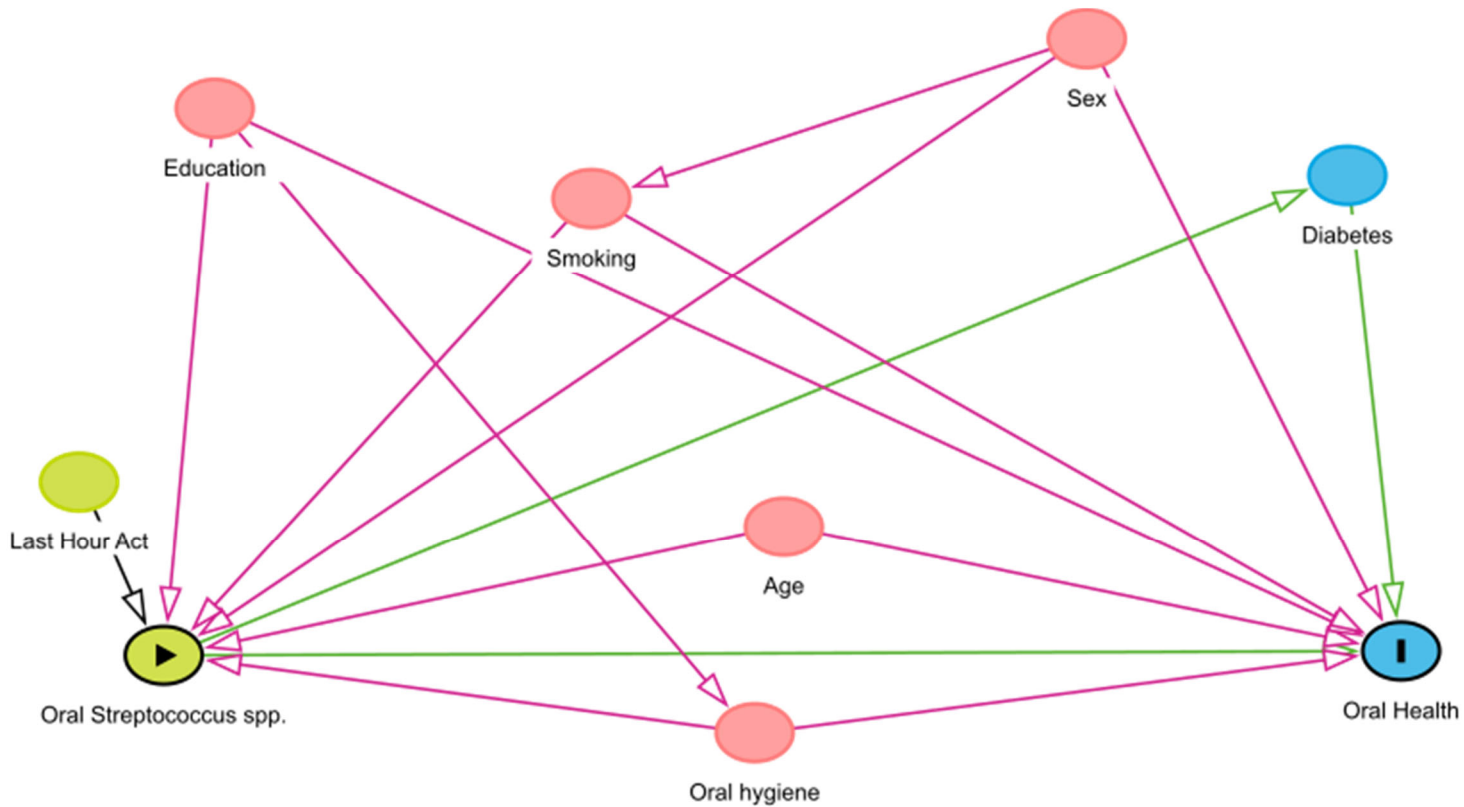

Source: https://medrxiv.org/content/10.1101/2022.05.25.22275561v1.full.pdf
